# Supplementary material
Source: PubMed Central journal article supplement (PMC4758217)
Supplement: NIHMS754950-supplement-Supporting.pdf [file NIHMS754950-supplement-Supporting.pdf]

# CHEMBIOCHEM

## Supporting Information

### **A ROS-Activatable Agent Elicits Homologous Recombination DNA Repair and Synergizes with Pathway Compounds**

Fathima Shazna Thowfeik,<sup>[a]</sup> Safnas F. AbdulSalam,<sup>[a]</sup> Mark Wunderlich,<sup>[b]</sup> Michael Wyder,<sup>[d]</sup> Kenneth D. Greis,<sup>[d]</sup> Ana L. Kadekaro,<sup>[c]</sup> James C. Mulloy,<sup>[b]</sup> and Edward J. Merino<sup>\*[a]</sup>

cbic\_201500304\_sm\_miscellaneous\_information.pdf

## Supporting Information

### Table of Contents

|                                                                            |     |
|----------------------------------------------------------------------------|-----|
| Example of nuclear protein extraction (Figure S1)                          | S-2 |
| 2D gel of nuclear protein (Figure S2)                                      | S-3 |
| Heat map of RNA-seq experiment (Figure S3)                                 | S-4 |
| Western blot analysis of $\gamma$ -H2AX in untransformed cells (Figure S4) | S-5 |
| Gene expression profile upon treatment (Table S1)                          | S-6 |

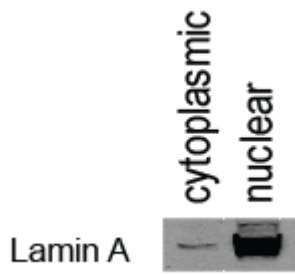

**Figure S1.** Example of nuclear protein extraction. Nuclear isolation enriches the nuclear marker, lamin A, by 9-fold.

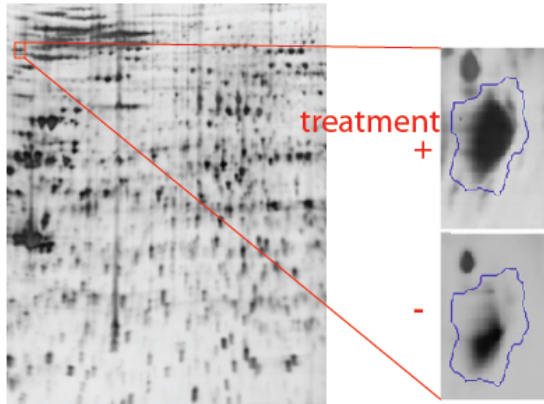

**Figure S2.** Example 2D gel of isolated nuclei. Nuclei from AML cell lines were isolated after treatment or control. An example a treatment gel is shown. Normalized protein was separated by 2D gel electrophoresis and quantified. The box region is enlarged and shown in both a treated and control sample gel image. Statistically different spots were identified.

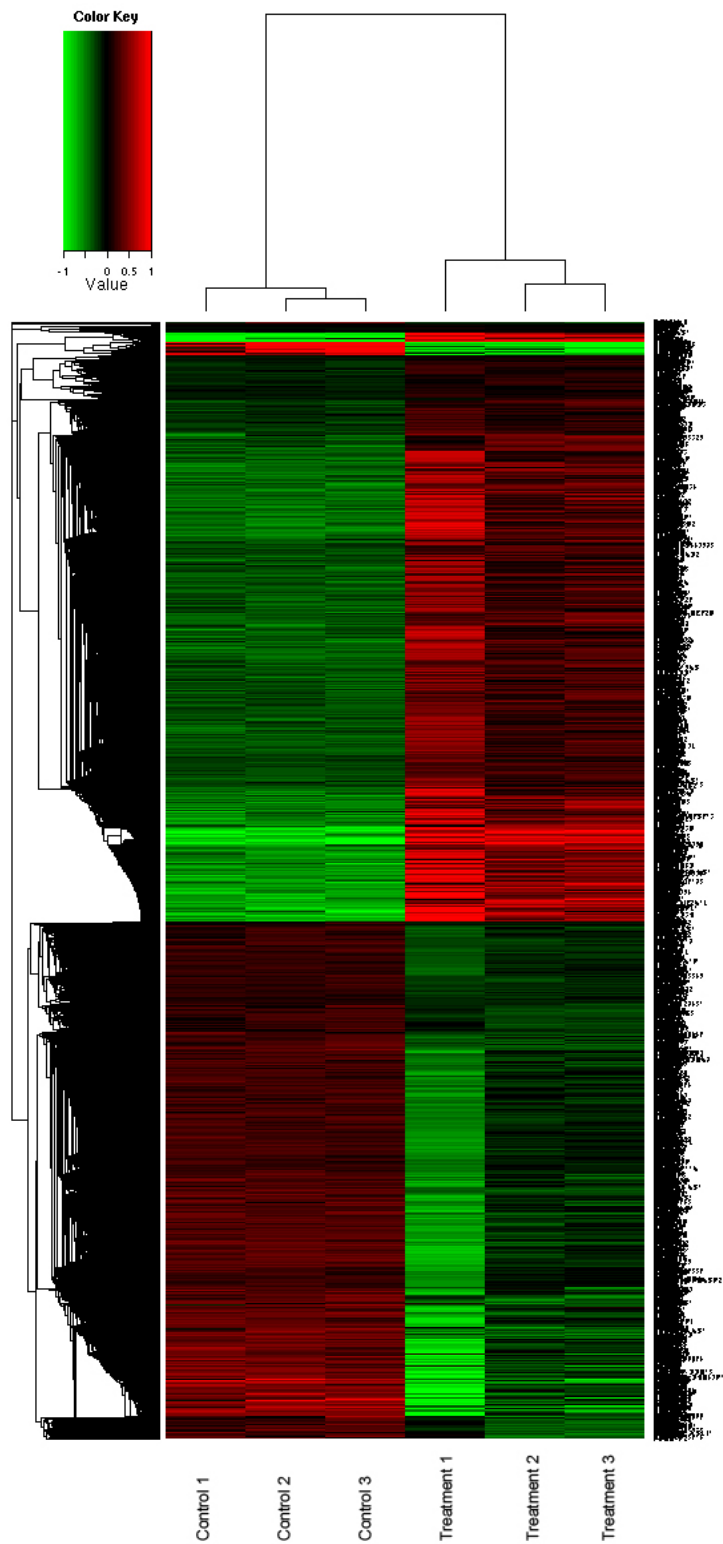

**Figure S3.** Expression changes upon treatment. RNA-seq heat map.

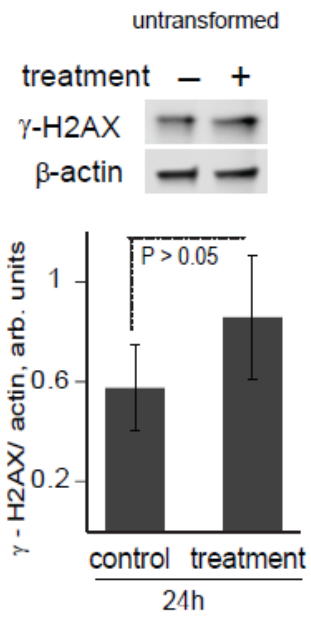

**Figure S4.** Western blot analysis for  $\gamma$ -H2AX in untransformed cells.

| Gene id | Symbol  | Name                                                                                   | Base Mean | Base Mean RAC1 | Base Mean Control | Fold Change | p-value |
|---------|---------|----------------------------------------------------------------------------------------|-----------|----------------|-------------------|-------------|---------|
| 151887  | CCDC80  | coiled-coil domain containing 80                                                       | 6.533     | 13.067         | A                 | A           | 0.000   |
| 84699   | CREB3L3 | cAMP responsive element binding protein 3-like 3                                       | 6.009     | 12.018         | A                 | A           | 0.000   |
| 114757  | CYGB    | cytoglobin                                                                             | 3.917     | 7.834          | A                 | A           | 0.001   |
| 29094   | LGALS1  | lectin, galactoside-binding-like                                                       | 3.838     | 7.676          | A                 | A           | 0.002   |
| 23604   | DAPK2   | death-associated protein kinase 2                                                      | 3.152     | 6.304          | A                 | A           | 0.004   |
| 358     | AQP1    | aquaporin 1 (Colton blood group)                                                       | 2.913     | 5.827          | A                 | A           | 0.007   |
| 1E+08   | GAGE12D | G antigen 12D                                                                          | 4.286     | 8.572          | A                 | A           | 0.012   |
| 729422  | GAGE12C | G antigen 12C                                                                          | 4.286     | 8.572          | A                 | A           | 0.012   |
| 729431  | GAGE12E | G antigen 12E                                                                          | 4.286     | 8.572          | A                 | A           | 0.012   |
| 7053    | TGM3    | transglutaminase 3 (E polypeptide, protein-glutamine-gamma-glutamyltransferase)        | 6.767     | 13.236         | 0.298             | 0.023       | 0.000   |
| 3891    | KRT85   | keratin 85                                                                             | 6.518     | 12.738         | 0.298             | 0.023       | 0.002   |
| 81029   | WNT5B   | wingless-type MMTV integration site family, member 5B                                  | 6.005     | 11.695         | 0.315             | 0.027       | 0.000   |
| 4855    | NOTCH4  | notch 4                                                                                | 4.761     | 9.224          | 0.298             | 0.032       | 0.001   |
| 2066    | ERBB4   | v-erb-a erythroblastic leukemia viral oncogene homolog 4 (avian)                       | 4.287     | 8.258          | 0.315             | 0.038       | 0.004   |
| 9853    | RUSC2   | RUN and SH3 domain containing 2                                                        | 8.285     | 15.955         | 0.614             | 0.038       | 0.000   |
| 3001    | GZMA    | granzyme A (granzyme 1, cytotoxic T-lymphocyte-associated serine esterase 3)           | 5.054     | 9.731          | 0.378             | 0.039       | 0.001   |
| 6678    | SPARC   | secreted protein, acidic, cysteine-rich (osteonectin)                                  | 16.929    | 32.568         | 1.290             | 0.040       | 0.000   |
| 923     | CD6     | CD6 molecule                                                                           | 10.567    | 20.221         | 0.912             | 0.045       | 0.000   |
| 1769    | DNAH8   | dynein, axonemal, heavy chain 8                                                        | 6.832     | 13.067         | 0.597             | 0.046       | 0.000   |
| 3250    | HPR     | haptoglobin-related protein                                                            | 36.804    | 70.364         | 3.245             | 0.046       | 0.000   |
| 7498    | XDH     | xanthine dehydrogenase                                                                 | 7.482     | 14.288         | 0.676             | 0.047       | 0.000   |
| 3887    | KRT81   | keratin 81                                                                             | 39.979    | 76.133         | 3.825             | 0.050       | 0.000   |
| 4318    | MMP9    | matrix metalloproteinase 9 (gelatinase B, 92kDa gelatinase, 92kDa type IV collagenase) | 76.585    | 144.888        | 8.282             | 0.057       | 0.000   |
| 6402    | SELL    | selectin L                                                                             | 8.183     | 15.471         | 0.895             | 0.058       | 0.000   |

|        |           |                                                                  |         |         |        |       |       |
|--------|-----------|------------------------------------------------------------------|---------|---------|--------|-------|-------|
| 1E+08  | NA        | NA                                                               | 11.605  | 21.903  | 1.307  | 0.060 | 0.000 |
| 120892 | LRRK2     | leucine-rich repeat kinase 2                                     | 260.982 | 491.915 | 30.049 | 0.061 | 0.000 |
| 80183  | KIAA0226L | KIAA0226-like                                                    | 38.756  | 73.028  | 4.484  | 0.061 | 0.000 |
| 3240   | HP        | haptoglobin                                                      | 220.690 | 412.863 | 28.518 | 0.069 | 0.000 |
| 3892   | KRT86     | keratin 86                                                       | 118.574 | 221.725 | 15.424 | 0.070 | 0.000 |
| 9381   | OTOF      | otoferlin                                                        | 5.094   | 9.512   | 0.676  | 0.071 | 0.003 |
| 4151   | MB        | myoglobin                                                        | 4.596   | 8.579   | 0.614  | 0.072 | 0.007 |
| 1E+08  | NA        | NA                                                               | 4.459   | 8.322   | 0.597  | 0.072 | 0.007 |
| 8557   | TCAP      | titin-cap                                                        | 7.060   | 13.146  | 0.975  | 0.074 | 0.000 |
| 115350 | FCRL1     | Fc receptor-like 1                                               | 58.052  | 108.061 | 8.044  | 0.074 | 0.000 |
| 27299  | ADAMD EC1 | ADAM-like, decysin 1                                             | 19.910  | 36.877  | 2.943  | 0.080 | 0.000 |
| 23569  | PADI4     | peptidyl arginine deiminase, type IV                             | 411.646 | 761.718 | 61.575 | 0.081 | 0.000 |
| 2191   | FAP       | fibroblast activation protein, alpha                             | 12.050  | 22.276  | 1.825  | 0.082 | 0.000 |
| 5551   | PRF1      | perforin 1 (pore forming protein)                                | 6.751   | 12.448  | 1.054  | 0.085 | 0.001 |
| 9935   | MAFB      | v-maf musculoaponeurotic fibrosarcoma oncogene homolog B (avian) | 85.072  | 156.330 | 13.815 | 0.088 | 0.000 |
| 7057   | THBS1     | thrombospondin 1                                                 | 130.334 | 238.475 | 22.193 | 0.093 | 0.000 |
| 6474   | SHOX2     | short stature homeobox 2                                         | 9.686   | 17.722  | 1.651  | 0.093 | 0.000 |
| 4192   | MDK       | midkine (neurite growth-promoting factor 2)                      | 7.073   | 12.918  | 1.228  | 0.095 | 0.002 |
| 10842  | PPP1R1 7  | protein phosphatase 1, regulatory subunit 17                     | 16.156  | 29.478  | 2.835  | 0.096 | 0.000 |
| 9447   | AIM2      | absent in melanoma 2                                             | 23.097  | 42.121  | 4.073  | 0.097 | 0.000 |
| 162461 | TMEM9 2   | transmembrane protein 92                                         | 11.615  | 21.167  | 2.063  | 0.097 | 0.000 |
| 671    | BPI       | bactericidal/permeability-increasing protein                     | 22.010  | 40.054  | 3.966  | 0.099 | 0.000 |
| 56243  | KIAA1217  | KIAA1217                                                         | 23.990  | 43.630  | 4.350  | 0.100 | 0.000 |
| 4648   | MYO7B     | myosin VII B                                                     | 33.631  | 61.096  | 6.165  | 0.101 | 0.000 |
| 3889   | KRT83     | keratin 83                                                       | 13.584  | 24.650  | 2.518  | 0.102 | 0.001 |
| 347    | APOD      | apolipoprotein D                                                 | 17.379  | 31.518  | 3.239  | 0.103 | 0.000 |
| 2312   | FLG       | filaggrin                                                        | 35.639  | 64.534  | 6.744  | 0.105 | 0.000 |
| 343521 | TCTEX1 D4 | Tctex1 domain containing 4                                       | 7.048   | 12.743  | 1.352  | 0.106 | 0.003 |
| 719    | C3AR1     | complement component 3a receptor 1                               | 97.582  | 176.403 | 18.761 | 0.106 | 0.000 |
| 7123   | CLEC3B    | C-type lectin domain family 3, member B                          | 7.872   | 14.218  | 1.526  | 0.107 | 0.006 |
| 4808   | NHLH2     | nescient helix loop helix 2                                      | 9.550   | 17.197  | 1.904  | 0.111 | 0.008 |



|        |                |                                                                                              |         |         |         |       |       |
|--------|----------------|----------------------------------------------------------------------------------------------|---------|---------|---------|-------|-------|
| 148113 | CILP2          | cartilage intermediate layer protein 2                                                       | 15.657  | 28.183  | 3.132   | 0.111 | 0.000 |
| 8876   | VNN1           | vanin 1                                                                                      | 208.489 | 375.154 | 41.824  | 0.111 | 0.000 |
| 2357   | FPR1           | formyl peptide receptor 1                                                                    | 56.474  | 101.521 | 11.427  | 0.113 | 0.000 |
| 6274   | S100A3         | S100 calcium binding protein A3                                                              | 13.850  | 24.884  | 2.816   | 0.113 | 0.000 |
| 79782  | LRRC31         | leucine rich repeat containing 31                                                            | 14.902  | 26.687  | 3.117   | 0.117 | 0.000 |
| 3680   | ITGA9          | integrin, alpha 9                                                                            | 5.829   | 10.414  | 1.245   | 0.120 | 0.008 |
| 199713 | NLRP7          | NLR family, pyrin domain containing 7                                                        | 23.819  | 42.398  | 5.240   | 0.124 | 0.000 |
| 4051   | CYP4F3         | cytochrome P450, family 4, subfamily F, polypeptide 3                                        | 15.117  | 26.898  | 3.336   | 0.124 | 0.000 |
| 1E+08  | NA             | NA                                                                                           | 8.395   | 14.901  | 1.889   | 0.127 | 0.001 |
| 10804  | GJB6           | gap junction protein, beta 6, 30kDa                                                          | 8.936   | 15.843  | 2.029   | 0.128 | 0.001 |
| 57664  | PLEKH A4       | pleckstrin homology domain containing, family A (phosphoinositide binding specific) member 4 | 7.416   | 13.102  | 1.730   | 0.132 | 0.002 |
| 164668 | APOBE C3H      | apolipoprotein B mRNA editing enzyme, catalytic polypeptide-like 3H                          | 64.094  | 113.221 | 14.967  | 0.132 | 0.000 |
| 91523  | PCED1 B        | PC-esterase domain containing 1B                                                             | 18.118  | 32.005  | 4.231   | 0.132 | 0.000 |
| 53829  | P2RY13         | purinergic receptor P2Y, G-protein coupled, 13                                               | 17.173  | 30.328  | 4.017   | 0.132 | 0.000 |
| 4973   | OLR1           | oxidized low density lipoprotein (lectin-like) receptor 1                                    | 14.235  | 25.118  | 3.353   | 0.133 | 0.001 |
| 440073 | IQSEC3         | IQ motif and Sec7 domain 3                                                                   | 9.237   | 16.288  | 2.185   | 0.134 | 0.001 |
| 366    | AQP9           | aquaporin 9                                                                                  | 13.842  | 24.364  | 3.321   | 0.136 | 0.001 |
| 2857   | GPR34          | G protein-coupled receptor 34                                                                | 54.176  | 95.265  | 13.086  | 0.137 | 0.000 |
| 1284   | COL4A2         | collagen, type IV, alpha 2                                                                   | 11.596  | 20.375  | 2.818   | 0.138 | 0.002 |
| 3101   | HK3            | hexokinase 3 (white cell)                                                                    | 653.904 | 1145.22 | 162.585 | 0.142 | 0.000 |
| 2219   | FCN1           | ficolin (collagen/fibrinogen domain containing) 1                                            | 90.345  | 158.200 | 22.490  | 0.142 | 0.000 |
| 10461  | MERTK          | c-mer proto-oncogene tyrosine kinase                                                         | 15.093  | 26.395  | 3.791   | 0.144 | 0.000 |
| 286749 | STON1-GTF2A1 L | STON1-GTF2A1L readthrough                                                                    | 109.996 | 192.111 | 27.880  | 0.145 | 0.000 |
| 1E+08  | GDNF-AS1       | GDNF antisense RNA 1 (head to head)                                                          | 5.696   | 9.944   | 1.449   | 0.146 | 0.009 |

|        |              |                                                                      |         |         |         |       |       |
|--------|--------------|----------------------------------------------------------------------|---------|---------|---------|-------|-------|
| 1E+08  | NA           | NA                                                                   | 9.243   | 16.108  | 2.378   | 0.148 | 0.001 |
| 1026   | CDKN1A       | cyclin-dependent kinase inhibitor 1A (p21, Cip1)                     | 3456.8  | 6021.21 | 892.387 | 0.148 | 0.000 |
| 3672   | ITGA1        | integrin, alpha 1                                                    | 59.059  | 102.784 | 15.333  | 0.149 | 0.000 |
| 941    | CD80         | CD80 molecule                                                        | 24.652  | 42.894  | 6.410   | 0.149 | 0.000 |
| 246    | ALOX15       | arachidonate 15-lipoxygenase                                         | 24.554  | 42.720  | 6.388   | 0.150 | 0.000 |
| 1E+08  | NA           | NA                                                                   | 14.058  | 24.439  | 3.678   | 0.150 | 0.000 |
| 8291   | DYSF         | dysferlin, limb girdle muscular dystrophy 2B (autosomal recessive)   | 28.768  | 49.917  | 7.619   | 0.153 | 0.000 |
| 1E+08  | LOC100507600 | uncharacterized LOC100507600                                         | 42.408  | 73.538  | 11.278  | 0.153 | 0.000 |
| 283491 | OR7E15 6P    | olfactory receptor, family 7, subfamily E, member 156 pseudogene     | 5.991   | 10.377  | 1.605   | 0.155 | 0.011 |
| 79778  | MICALL2      | MICAL-like 2                                                         | 37.633  | 65.022  | 10.243  | 0.158 | 0.001 |
| 3675   | ITGA3        | integrin, alpha 3 (antigen CD49C, alpha 3 subunit of VLA-3 receptor) | 6.011   | 10.371  | 1.651   | 0.159 | 0.011 |
| 25984  | KRT23        | keratin 23 (histone deacetylase inducible)                           | 52.003  | 89.641  | 14.365  | 0.160 | 0.000 |
| 5617   | PRL          | prolactin                                                            | 93.119  | 160.477 | 25.760  | 0.161 | 0.000 |
| 64411  | ARAP3        | ArfGAP with RhoGAP domain, ankyrin repeat and PH domain 3            | 39.266  | 67.576  | 10.957  | 0.162 | 0.000 |
| 1191   | CLU          | clusterin                                                            | 45.797  | 78.750  | 12.844  | 0.163 | 0.000 |
| 5332   | PLCB4        | phospholipase C, beta 4                                              | 67.069  | 115.254 | 18.884  | 0.164 | 0.000 |
| 11037  | STON1        | stonin 1                                                             | 244.288 | 418.759 | 69.817  | 0.167 | 0.000 |
| 25780  | RASGR P3     | RAS guanyl releasing protein 3 (calcium and DAG-regulated)           | 14.111  | 24.068  | 4.154   | 0.173 | 0.000 |
| 338440 | ANO9         | anoctamin 9                                                          | 6.618   | 11.286  | 1.949   | 0.173 | 0.010 |
| 1289   | COL5A1       | collagen, type V, alpha 1                                            | 15.719  | 26.745  | 4.693   | 0.175 | 0.001 |
| 1057   | CELP         | carboxyl ester lipase pseudogene                                     | 15.752  | 26.773  | 4.732   | 0.177 | 0.000 |
| 56670  | SUCNR1       | succinate receptor 1                                                 | 1120.4  | 1903.95 | 336.999 | 0.177 | 0.000 |
| 115019 | SLC26A9      | solute carrier family 26, member 9                                   | 12.838  | 21.806  | 3.870   | 0.177 | 0.001 |
| 3162   | HMOX1        | heme oxygenase (decycling) 1                                         | 59.046  | 100.284 | 17.809  | 0.178 | 0.009 |
| 6708   | SPTA1        | spectrin, alpha, erythrocytic 1 (elliptocytosis 2)                   | 7.883   | 13.370  | 2.395   | 0.179 | 0.006 |
| 340206 | TREML3P      | triggering receptor expressed on myeloid cells-like 3, pseudogene    | 9.290   | 15.717  | 2.864   | 0.182 | 0.002 |

|        |              |                                                                       |         |         |         |       |       |
|--------|--------------|-----------------------------------------------------------------------|---------|---------|---------|-------|-------|
| 55301  | OLAH         | oleoyl-ACP hydrolase triggering receptor expressed on myeloid cells 2 | 341.944 | 577.458 | 106.431 | 0.184 | 0.000 |
| 54209  | TREM2        | lipoxigenase homology domains 1                                       | 37.697  | 63.518  | 11.875  | 0.187 | 0.000 |
| 125336 | LOXHD1       | CD1a molecule                                                         | 240.025 | 404.190 | 75.861  | 0.188 | 0.000 |
| 909    | CD1A         | ADP-ribosylation factor-like 14 effector protein-like                 | 14.942  | 25.149  | 4.734   | 0.188 | 0.000 |
| 644100 | ARL14EPL     | uncharacterized LOC100507195                                          | 10.060  | 16.927  | 3.194   | 0.189 | 0.003 |
| 1E+08  | LOC100507195 | uncharacterized LOC100506115                                          | 15.713  | 26.433  | 4.992   | 0.189 | 0.000 |
| 1E+08  | LOC100506115 | extracellular matrix protein 1                                        | 16.798  | 28.245  | 5.351   | 0.189 | 0.000 |
| 1893   | ECM1         | S100 calcium binding protein A12                                      | 814.349 | 1368.26 | 260.430 | 0.190 | 0.000 |
| 6283   | S100A12      | myosin VC                                                             | 370.554 | 622.568 | 118.539 | 0.190 | 0.000 |
| 55930  | MYO5C        | complement component 3                                                | 42.393  | 71.199  | 13.586  | 0.191 | 0.000 |
| 718    | C3           | CD69 molecule                                                         | 449.622 | 754.567 | 144.676 | 0.192 | 0.000 |
| 969    | CD69         | carboxyl ester lipase (bile salt-stimulated lipase)                   | 275.873 | 462.656 | 89.090  | 0.193 | 0.000 |
| 1056   | CEL          | interleukin 18 receptor accessory protein                             | 37.633  | 63.093  | 12.174  | 0.193 | 0.000 |
| 8807   | IL18RAP      | S100 calcium binding protein P                                        | 230.434 | 385.459 | 75.410  | 0.196 | 0.000 |
| 6286   | S100P        | transient receptor potential cation channel, subfamily M, member 1    | 64.748  | 108.284 | 21.212  | 0.196 | 0.000 |
| 4308   | TRPM1        | lectin, galactoside-binding, soluble, 2                               | 14.588  | 24.394  | 4.783   | 0.196 | 0.001 |
| 3957   | LGALS2       | sortilin 1                                                            | 44.655  | 74.635  | 14.675  | 0.197 | 0.000 |
| 6272   | SORT1        | S100 calcium binding protein B                                        | 239.198 | 399.009 | 79.387  | 0.199 | 0.000 |
| 6285   | S100B        | desmin                                                                | 102.542 | 170.824 | 34.259  | 0.201 | 0.000 |
| 1674   | DES          | pentraxin 3, long                                                     | 52.002  | 86.290  | 17.714  | 0.205 | 0.000 |
| 5806   | PTX3         | vanin 2                                                               | 157.710 | 261.690 | 53.730  | 0.205 | 0.000 |
| 8875   | VNN2         | selenium binding protein 1                                            | 32.223  | 53.445  | 11.001  | 0.206 | 0.000 |
| 8991   | SELENBP1     | NA                                                                    | 33.093  | 54.871  | 11.316  | 0.206 | 0.000 |
| 1E+08  | NA           | cytochrome P450, family 2, subfamily F, polypeptide 1                 | 7.770   | 12.881  | 2.659   | 0.206 | 0.010 |
| 1572   | CYP2F1       | progressive rod-cone degeneration                                     | 8.498   | 14.066  | 2.929   | 0.208 | 0.008 |
| 768206 | PRCD         | FXFD domain containing ion transport regulator 6                      | 9.182   | 15.198  | 3.165   | 0.208 | 0.006 |
| 53826  | FXFD6        | transcobalamin II                                                     | 50.334  | 83.292  | 17.375  | 0.209 | 0.000 |
| 6948   | TCN2         |                                                                       | 68.345  | 112.990 | 23.701  | 0.210 | 0.000 |

|        |            |                                                                            |         |         |         |       |       |
|--------|------------|----------------------------------------------------------------------------|---------|---------|---------|-------|-------|
| 50615  | IL21R      | interleukin 21 receptor                                                    | 210.156 | 347.353 | 72.959  | 0.210 | 0.000 |
| 116071 | BATF2      | basic leucine zipper transcription factor, ATF-like 2                      | 8.231   | 13.601  | 2.862   | 0.210 | 0.010 |
| 8857   | FCGBP      | Fc fragment of IgG binding protein                                         | 104.684 | 172.956 | 36.412  | 0.211 | 0.000 |
| 2358   | FPR2       | formyl peptide receptor 2                                                  | 894.511 | 1475.85 | 313.170 | 0.212 | 0.000 |
| 929    | CD14       | CD14 molecule                                                              | 447.103 | 737.194 | 157.012 | 0.213 | 0.000 |
| 57576  | KIF17      | kinesin family member 17                                                   | 11.906  | 19.615  | 4.197   | 0.214 | 0.007 |
| 55026  | TMEM255A   | transmembrane protein 255A                                                 | 34.072  | 55.990  | 12.154  | 0.217 | 0.000 |
| 28514  | DLL1       | delta-like 1 (Drosophila)                                                  | 11.523  | 18.903  | 4.142   | 0.219 | 0.003 |
| 64753  | CCDC136    | coiled-coil domain containing 136                                          | 17.848  | 29.274  | 6.422   | 0.219 | 0.000 |
| 23612  | PHLDA3     | pleckstrin homology-like domain, family A, member 3                        | 82.383  | 134.877 | 29.889  | 0.222 | 0.000 |
| 653361 | NCF1       | neutrophil cytosolic factor 1                                              | 351.364 | 575.206 | 127.522 | 0.222 | 0.003 |
| 2012   | EMP1       | epithelial membrane protein 1                                              | 232.888 | 381.216 | 84.560  | 0.222 | 0.000 |
| 81607  | PVRL4      | poliovirus receptor-related 4                                              | 38.643  | 63.146  | 14.139  | 0.224 | 0.000 |
| 389118 | CDHR4      | cadherin-related family member 4                                           | 13.391  | 21.826  | 4.956   | 0.227 | 0.002 |
| 6947   | TCN1       | transcobalamin I (vitamin B12 binding protein, R binder family)            | 149.098 | 242.972 | 55.224  | 0.227 | 0.000 |
| 6640   | SNTA1      | syntrophin, alpha 1                                                        | 9.409   | 15.309  | 3.509   | 0.229 | 0.008 |
| 3976   | LIF        | leukemia inhibitory factor                                                 | 37.561  | 61.079  | 14.043  | 0.230 | 0.000 |
| 2633   | GBP1       | guanylate binding protein 1, interferon-inducible                          | 38.300  | 62.273  | 14.326  | 0.230 | 0.000 |
| 355    | FAS        | Fas (TNF receptor superfamily, member 6)                                   | 137.573 | 223.581 | 51.565  | 0.231 | 0.000 |
| 1277   | COL1A1     | collagen, type I, alpha 1                                                  | 48.302  | 78.428  | 18.175  | 0.232 | 0.010 |
| 339400 | FLG-AS1    | FLG antisense RNA 1                                                        | 11.116  | 18.030  | 4.203   | 0.233 | 0.005 |
| 10863  | ADAM28     | ADAM metallopeptidase domain 28                                            | 37.358  | 60.583  | 14.134  | 0.233 | 0.000 |
| 6368   | CCL23      | chemokine (C-C motif) ligand 23                                            | 54.340  | 88.041  | 20.638  | 0.234 | 0.000 |
| 3983   | ABLIM1     | actin binding LIM protein 1                                                | 22.689  | 36.752  | 8.626   | 0.235 | 0.000 |
| 5003   | SLC22A18AS | solute carrier family 22 (organic cation transporter), member 18 antisense | 24.738  | 40.035  | 9.442   | 0.236 | 0.000 |
| 128506 | OCSTAMP    | osteoclast stimulatory transmembrane protein                               | 13.155  | 21.244  | 5.066   | 0.238 | 0.002 |
| 3075   | CFH        | complement factor H                                                        | 17.919  | 28.927  | 6.911   | 0.239 | 0.001 |

|        |            |                                                                                               |         |         |         |       |       |
|--------|------------|-----------------------------------------------------------------------------------------------|---------|---------|---------|-------|-------|
| 641700 | ECSCR      | endothelial cell surface expressed chemotaxis and apoptosis regulator                         | 24.095  | 38.888  | 9.302   | 0.239 | 0.000 |
| 79083  | MLPH       | melanophilin                                                                                  | 209.700 | 338.183 | 81.218  | 0.240 | 0.000 |
| 597    | BCL2A1     | BCL2-related protein A1                                                                       | 135.174 | 217.965 | 52.383  | 0.240 | 0.000 |
| 58476  | TP53IN P2  | tumor protein p53 inducible nuclear protein 2                                                 | 561.748 | 905.718 | 217.778 | 0.240 | 0.000 |
| 8794   | TNFRSF 10C | tumor necrosis factor receptor superfamily, member 10c, decoy without an intracellular domain | 8.390   | 13.522  | 3.258   | 0.241 | 0.011 |
| 654817 | NCF1C      | neutrophil cytosolic factor 1C pseudogene                                                     | 335.753 | 540.070 | 131.436 | 0.243 | 0.003 |
| 1043   | CD52       | CD52 molecule                                                                                 | 297.309 | 478.043 | 116.575 | 0.244 | 0.008 |
| 2208   | FCER2      | Fc fragment of IgE, low affinity II, receptor for (CD23)                                      | 486.593 | 780.709 | 192.477 | 0.247 | 0.000 |
| 388697 | HRNR       | hornerin                                                                                      | 36.852  | 59.089  | 14.615  | 0.247 | 0.000 |
| 115653 | KIR3DL 3   | killer cell immunoglobulin-like receptor, three domains, long cytoplasmic tail, 3             | 9.391   | 15.052  | 3.730   | 0.248 | 0.010 |
| 8544   | PIR        | pirin (iron-binding nuclear protein)                                                          | 34.854  | 55.844  | 13.864  | 0.248 | 0.000 |
| 9881   | TRANK 1    | tetratricopeptide repeat and ankyrin repeat containing 1                                      | 318.727 | 510.418 | 127.037 | 0.249 | 0.000 |
| 284417 | TMEM1 50B  | transmembrane protein 150B                                                                    | 30.456  | 48.726  | 12.186  | 0.250 | 0.000 |
| 115362 | GBP5       | guanylate binding protein 5                                                                   | 158.405 | 253.243 | 63.568  | 0.251 | 0.000 |
| 25903  | OLFML2 B   | olfactomedin-like 2B                                                                          | 28.094  | 44.890  | 11.299  | 0.252 | 0.000 |
| 84658  | EMR3       | egf-like module containing, mucin-like, hormone receptor-like 3                               | 18.436  | 29.414  | 7.459   | 0.254 | 0.001 |
| 79168  | LILRA6     | leukocyte immunoglobulin-like receptor, subfamily A (with TM domain), member 6                | 728.551 | 1162.32 | 294.781 | 0.254 | 0.000 |
| 55655  | NLRP2      | NLR family, pyrin domain containing 2                                                         | 187.582 | 299.172 | 75.991  | 0.254 | 0.000 |
| 2686   | GGT7       | gamma-glutamyltransferase 7                                                                   | 13.935  | 22.210  | 5.661   | 0.255 | 0.003 |
| 80737  | VWA7       | von Willebrand factor A domain containing 7                                                   | 19.041  | 30.324  | 7.757   | 0.256 | 0.001 |
| 201456 | FBXO15     | F-box protein 15                                                                              | 34.904  | 55.586  | 14.223  | 0.256 | 0.000 |
| 55561  | CDC42 BPG  | CDC42 binding protein kinase gamma (DMPK-like)                                                | 9.240   | 14.704  | 3.776   | 0.257 | 0.010 |

|        |            |                                                                                 |         |         |         |       |       |
|--------|------------|---------------------------------------------------------------------------------|---------|---------|---------|-------|-------|
| 79625  | NDNF       | neuron-derived neurotrophic factor                                              | 112.407 | 178.744 | 46.070  | 0.258 | 0.000 |
| 1E+08  | ZNF503-AS2 | ZNF503 antisense RNA 2                                                          | 27.420  | 43.583  | 11.257  | 0.258 | 0.000 |
| 4818   | NKG7       | natural killer cell group 7 sequence                                            | 472.068 | 749.895 | 194.241 | 0.259 | 0.000 |
| 8638   | OASL       | 2'-5'-oligoadenylate synthetase-like                                            | 48.075  | 76.367  | 19.783  | 0.259 | 0.000 |
| 9289   | GPR56      | G protein-coupled receptor 56                                                   | 24.275  | 38.544  | 10.007  | 0.260 | 0.000 |
| 1E+08  | PIR-FIGF   | PIR-FIGF readthrough                                                            | 23.818  | 37.816  | 9.820   | 0.260 | 0.000 |
| 339665 | SLC35E4    | solute carrier family 35, member E4                                             | 15.306  | 24.301  | 6.311   | 0.260 | 0.002 |
| 10580  | SORBS1     | sorbin and SH3 domain containing 1                                              | 12.609  | 20.007  | 5.211   | 0.260 | 0.006 |
| 222487 | GPR97      | G protein-coupled receptor 97                                                   | 142.700 | 226.306 | 59.094  | 0.261 | 0.000 |
| 5199   | CFP        | complement factor properdin                                                     | 275.958 | 436.384 | 115.532 | 0.265 | 0.000 |
| 10170  | DHRS9      | dehydrogenase/reductase (SDR family) member 9                                   | 1249.03 | 1974.46 | 523.600 | 0.265 | 0.000 |
| 3108   | HLA-DMA    | major histocompatibility complex, class II, DM alpha                            | 56.576  | 89.356  | 23.797  | 0.266 | 0.000 |
| 3127   | HLA-DRB5   | major histocompatibility complex, class II, DR beta 5                           | 118.443 | 186.971 | 49.914  | 0.267 | 0.000 |
| 116379 | IL22RA2    | interleukin 22 receptor, alpha 2                                                | 52.016  | 82.108  | 21.925  | 0.267 | 0.000 |
| 2051   | EPHB6      | EPH receptor B6                                                                 | 24.981  | 39.420  | 10.542  | 0.267 | 0.000 |
| 64761  | PARP12     | poly (ADP-ribose) polymerase family, member 12                                  | 117.745 | 185.706 | 49.784  | 0.268 | 0.000 |
| 654816 | NCF1B      | neutrophil cytosolic factor 1B pseudogene                                       | 316.273 | 498.560 | 133.986 | 0.269 | 0.001 |
| 27123  | DKK2       | dickkopf 2 homolog (Xenopus laevis)                                             | 21.857  | 34.449  | 9.265   | 0.269 | 0.000 |
| 79007  | DBNDD1     | dysbindin (dystrobrevin binding protein 1) domain containing 1                  | 33.809  | 53.266  | 14.351  | 0.269 | 0.000 |
| 10234  | LRRC17     | leucine rich repeat containing 17                                               | 26.513  | 41.695  | 11.331  | 0.272 | 0.001 |
| 6504   | SLAMF1     | signaling lymphocytic activation molecule family member 1                       | 40.700  | 63.875  | 17.525  | 0.274 | 0.000 |
| 3805   | KIR2DL4    | killer cell immunoglobulin-like receptor, two domains, long cytoplasmic tail, 4 | 30.335  | 47.569  | 13.100  | 0.275 | 0.000 |

|        |           |                                                                                  |         |         |         |       |       |
|--------|-----------|----------------------------------------------------------------------------------|---------|---------|---------|-------|-------|
| 9580   | SOX13     | SRY (sex determining region Y)-box 13                                            | 25.152  | 39.441  | 10.862  | 0.275 | 0.000 |
| 387751 | GVINP1    | GTPase, very large interferon inducible pseudogene 1                             | 50.983  | 79.883  | 22.082  | 0.276 | 0.000 |
| 255809 | C19orf38  | chromosome 19 open reading frame 38                                              | 217.978 | 341.364 | 94.593  | 0.277 | 0.000 |
| 9582   | APOBE3B   | apolipoprotein B mRNA editing enzyme, catalytic polypeptide-like 3B              | 429.519 | 671.875 | 187.163 | 0.279 | 0.000 |
| 89858  | SIGLEC12  | sialic acid binding Ig-like lectin 12 (gene/pseudogene)                          | 107.359 | 167.854 | 46.865  | 0.279 | 0.000 |
| 162466 | PHOSPHO1  | phosphatase, orphan 1                                                            | 18.228  | 28.495  | 7.962   | 0.279 | 0.001 |
| 1E+08  | NA        | NA                                                                               | 17.129  | 26.770  | 7.488   | 0.280 | 0.003 |
| 23057  | NMNAT2    | nicotinamide nucleotide adenylyltransferase 2                                    | 77.367  | 120.843 | 33.891  | 0.280 | 0.000 |
| 3553   | IL1B      | interleukin 1, beta                                                              | 208.608 | 324.960 | 92.256  | 0.284 | 0.000 |
| 25797  | QPCT      | glutaminy-peptide cyclotransferase                                               | 28.567  | 44.497  | 12.636  | 0.284 | 0.000 |
| 27040  | LAT       | linker for activation of T cells                                                 | 158.892 | 247.468 | 70.315  | 0.284 | 0.000 |
| 1101   | CHAD      | chondroadherin                                                                   | 18.840  | 29.318  | 8.361   | 0.285 | 0.001 |
| 57105  | CYSLTR2   | cysteinyl leukotriene receptor 2                                                 | 63.651  | 98.979  | 28.323  | 0.286 | 0.000 |
| 283888 | IL21R-AS1 | IL21R antisense RNA 1                                                            | 111.227 | 172.923 | 49.532  | 0.286 | 0.000 |
| 1588   | CYP19A1   | cytochrome P450, family 19, subfamily A, polypeptide 1                           | 34.145  | 53.079  | 15.210  | 0.287 | 0.001 |
| 2634   | GBP2      | guanylate binding protein 2, interferon-inducible                                | 654.367 | 1016.54 | 292.193 | 0.287 | 0.000 |
| 29950  | SERTA1    | SERTA domain containing 1                                                        | 55.446  | 86.132  | 24.760  | 0.287 | 0.000 |
| 3674   | ITGA2B    | integrin, alpha 2b (platelet glycoprotein IIb of IIb/IIIa complex, antigen CD41) | 119.774 | 185.946 | 53.601  | 0.288 | 0.000 |
| 1116   | CHI3L1    | chitinase 3-like 1 (cartilage glycoprotein-39)                                   | 155.746 | 241.737 | 69.755  | 0.289 | 0.000 |
| 6508   | SLC4A3    | solute carrier family 4, anion exchanger, member 3                               | 48.743  | 75.653  | 21.833  | 0.289 | 0.000 |
| 5724   | PTAFR     | platelet-activating factor receptor                                              | 278.644 | 432.131 | 125.157 | 0.290 | 0.000 |
| 911    | CD1C      | CD1c molecule                                                                    | 14.123  | 21.901  | 6.344   | 0.290 | 0.006 |
| 51738  | GHRL      | ghrelin/obestatin prepropeptide                                                  | 26.256  | 40.715  | 11.796  | 0.290 | 0.000 |

|        |            |                                                                                 |         |         |         |       |       |
|--------|------------|---------------------------------------------------------------------------------|---------|---------|---------|-------|-------|
| 146850 | PIK3R6     | phosphoinositide-3-kinase, regulatory subunit 6                                 | 51.765  | 80.222  | 23.308  | 0.291 | 0.000 |
| 1672   | DEFB1      | defensin, beta 1                                                                | 29.786  | 46.142  | 13.431  | 0.291 | 0.000 |
| 5998   | RGS3       | regulator of G-protein signaling 3                                              | 28.491  | 44.133  | 12.850  | 0.291 | 0.000 |
| 200931 | SLC51A     | solute carrier family 51, alpha subunit                                         | 23.267  | 36.022  | 10.511  | 0.292 | 0.001 |
| 84446  | BRSK1      | BR serine/threonine kinase 1                                                    | 32.764  | 50.703  | 14.825  | 0.292 | 0.000 |
| 360    | AQP3       | aquaporin 3 (Gill blood group)                                                  | 17.044  | 26.360  | 7.729   | 0.293 | 0.006 |
| 27036  | SIGLEC 7   | sialic acid binding Ig-like lectin 7                                            | 69.863  | 108.045 | 31.681  | 0.293 | 0.000 |
| 5055   | SERPIN B2  | serpin peptidase inhibitor, clade B (ovalbumin), member 2                       | 1239.75 | 1915.45 | 564.058 | 0.294 | 0.000 |
| 51267  | CLEC1A     | C-type lectin domain family 1, member A                                         | 13.064  | 20.179  | 5.950   | 0.295 | 0.010 |
| 9034   | CCRL2      | chemokine (C-C motif) receptor-like 2                                           | 20.238  | 31.255  | 9.221   | 0.295 | 0.002 |
| 6348   | CCL3       | chemokine (C-C motif) ligand 3                                                  | 73.333  | 113.182 | 33.484  | 0.296 | 0.000 |
| 23710  | GABAR APL1 | GABA(A) receptor-associated protein like 1                                      | 136.420 | 210.172 | 62.667  | 0.298 | 0.000 |
| 978    | CDA        | cytidine deaminase                                                              | 125.862 | 193.673 | 58.051  | 0.300 | 0.008 |
| 1953   | MEGF6      | multiple EGF-like-domains 6                                                     | 25.268  | 38.877  | 11.658  | 0.300 | 0.001 |
| 54492  | NEURL 1B   | neuralized homolog 1B (Drosophila)                                              | 12.642  | 19.419  | 5.865   | 0.302 | 0.010 |
| 7052   | TGM2       | transglutaminase 2 (C polypeptide, protein-glutamine-gamma-glutamyltransferase) | 21.395  | 32.857  | 9.933   | 0.302 | 0.001 |
| 5376   | PMP22      | peripheral myelin protein 22                                                    | 121.033 | 185.867 | 56.200  | 0.302 | 0.000 |
| 3684   | ITGAM      | integrin, alpha M (complement component 3 receptor 3 subunit)                   | 2092.63 | 3212.11 | 973.153 | 0.303 | 0.000 |
| 3628   | INPP1      | inositol polyphosphate-1-phosphatase                                            | 13.843  | 21.235  | 6.450   | 0.304 | 0.009 |
| 1E+08  | NA         | NA                                                                              | 79.290  | 121.576 | 37.003  | 0.304 | 0.001 |
| 11142  | PKIG       | protein kinase (cAMP-dependent, catalytic) inhibitor gamma                      | 41.144  | 63.076  | 19.211  | 0.305 | 0.000 |
| 5920   | RARRE S3   | retinoic acid receptor responder (tazarotene induced) 3                         | 19.818  | 30.368  | 9.269   | 0.305 | 0.001 |
| 1E+08  | NA         | NA                                                                              | 17.783  | 27.239  | 8.328   | 0.306 | 0.005 |



|        |              |                                                                                                                |         |         |         |       |       |
|--------|--------------|----------------------------------------------------------------------------------------------------------------|---------|---------|---------|-------|-------|
| 3809   | KIR2DS4      | killer cell immunoglobulin-like receptor, two domains, short cytoplasmic tail, 4 ArfGAP with dual PH domains 2 | 15.379  | 23.553  | 7.206   | 0.306 | 0.007 |
| 55803  | ADAP2        | sialic acid binding Ig-like lectin 5                                                                           | 102.736 | 157.333 | 48.139  | 0.306 | 0.000 |
| 8778   | SIGLEC5      | interleukin 7 receptor                                                                                         | 113.406 | 173.328 | 53.484  | 0.309 | 0.000 |
| 3575   | IL7R         | uncharacterized LOC100506328                                                                                   | 2285.62 | 3491.82 | 1079.42 | 0.309 | 0.000 |
| 1E+08  | LOC100506328 | protocadherin 12                                                                                               | 16.162  | 24.676  | 7.648   | 0.310 | 0.004 |
| 51294  | PCDH12       | transcription factor AP-2 gamma (activating enhancer binding protein 2 gamma)                                  | 64.341  | 98.196  | 30.485  | 0.310 | 0.000 |
| 7022   | TFAP2C       | leukocyte immunoglobulin-like receptor, subfamily A (with TM domain), member 5                                 | 60.794  | 92.781  | 28.808  | 0.310 | 0.000 |
| 353514 | LILRA5       | apolipoprotein L, 3                                                                                            | 464.947 | 709.182 | 220.711 | 0.311 | 0.000 |
| 80833  | APOL3        | synaptotagmin XI                                                                                               | 50.785  | 77.319  | 24.251  | 0.314 | 0.000 |
| 23208  | SYT11        | plexin A2                                                                                                      | 355.270 | 540.740 | 169.799 | 0.314 | 0.000 |
| 5362   | PLXNA2       | chemokine (C-C motif) receptor 7                                                                               | 99.487  | 151.327 | 47.647  | 0.315 | 0.000 |
| 1236   | CCR7         | S100 calcium binding protein A8                                                                                | 18.562  | 28.229  | 8.896   | 0.315 | 0.005 |
| 6279   | S100A8       | leukocyte immunoglobulin-like receptor, subfamily B (with TM and ITIM domains), member 3                       | 8706.49 | 13231   | 4182.09 | 0.316 | 0.000 |
| 11025  | LILRB3       | sprouty homolog 4 (Drosophila)                                                                                 | 522.165 | 792.960 | 251.370 | 0.317 | 0.000 |
| 81848  | SPRY4        | ferredoxin reductase                                                                                           | 37.501  | 56.940  | 18.062  | 0.317 | 0.000 |
| 2232   | FDXR         | tyrosylprotein sulfotransferase 1                                                                              | 309.156 | 469.282 | 149.031 | 0.318 | 0.000 |
| 8460   | TPST1        | family with sequence similarity 65, member B                                                                   | 39.327  | 59.687  | 18.967  | 0.318 | 0.000 |
| 9750   | FAM65B       | chromosome 19 open reading frame 59                                                                            | 650.884 | 987.751 | 314.017 | 0.318 | 0.000 |
| 199675 | C19orf59     | secretory leukocyte peptidase inhibitor                                                                        | 2200.32 | 3336.17 | 1064.47 | 0.319 | 0.000 |
| 6590   | SLPI         | keratin 80                                                                                                     | 48.746  | 73.909  | 23.582  | 0.319 | 0.000 |
| 144501 | KRT80        | glutamate receptor, ionotropic, N-methyl-D-aspartate 3A                                                        | 102.012 | 154.565 | 49.459  | 0.320 | 0.000 |
| 116443 | GRIN3A       | SLAM family member 8                                                                                           | 107.397 | 162.580 | 52.213  | 0.321 | 0.000 |
| 56833  | SLAMF8       | NA                                                                                                             | 17.795  | 26.931  | 8.660   | 0.322 | 0.004 |
| 1E+08  | NA           | NA                                                                                                             | 21.722  | 32.871  | 10.574  | 0.322 | 0.002 |
| 57648  | KIAA1522     | KIAA1522                                                                                                       | 37.727  | 57.072  | 18.382  | 0.322 | 0.000 |

|        |           |                                                                                          |         |         |         |       |       |
|--------|-----------|------------------------------------------------------------------------------------------|---------|---------|---------|-------|-------|
| 3097   | HIVEP2    | human immunodeficiency virus type I enhancer binding protein 2                           | 24.582  | 37.182  | 11.982  | 0.322 | 0.001 |
| 933    | CD22      | CD22 molecule                                                                            | 24.968  | 37.753  | 12.183  | 0.323 | 0.002 |
| 84981  | MIR22HG   | MIR22 host gene (non-protein coding)                                                     | 88.166  | 133.211 | 43.121  | 0.324 | 0.000 |
| 255031 | FLJ35390  | uncharacterized LOC255031                                                                | 16.668  | 25.179  | 8.157   | 0.324 | 0.006 |
| 2268   | FGR       | Gardner-Rasheed feline sarcoma viral (v-fgr) oncogene homolog                            | 1212.78 | 1831.40 | 594.158 | 0.324 | 0.000 |
| 79605  | PGBD5     | piggyBac transposable element derived 5                                                  | 16.709  | 25.230  | 8.188   | 0.325 | 0.004 |
| 2015   | EMR1      | egf-like module containing, mucin-like, hormone receptor-like 1                          | 161.797 | 244.218 | 79.377  | 0.325 | 0.000 |
| 57447  | NDRG2     | NDRG family member 2                                                                     | 62.421  | 94.153  | 30.689  | 0.326 | 0.000 |
| 10769  | PLK2      | polo-like kinase 2                                                                       | 1291.69 | 1948.14 | 635.246 | 0.326 | 0.000 |
| 55062  | WIPI1     | WD repeat domain, phosphoinositide interacting 1                                         | 155.320 | 234.088 | 76.551  | 0.327 | 0.000 |
| 23363  | OBSL1     | obscurin-like 1                                                                          | 193.822 | 291.920 | 95.725  | 0.328 | 0.001 |
| 165140 | OXER1     | oxoeicosanoid (OXE) receptor 1                                                           | 56.230  | 84.681  | 27.779  | 0.328 | 0.000 |
| 2793   | GNGT2     | guanine nucleotide binding protein (G protein), gamma transducing activity polypeptide 2 | 60.828  | 91.560  | 30.095  | 0.329 | 0.000 |
| 5004   | ORM1      | orosomucoid 1                                                                            | 53.191  | 80.045  | 26.336  | 0.329 | 0.011 |
| 642402 | LOC642402 | golgin A6 family, member A pseudogene                                                    | 41.995  | 63.131  | 20.860  | 0.330 | 0.003 |
| 27180  | SIGLEC9   | sialic acid binding Ig-like lectin 9                                                     | 74.724  | 112.286 | 37.162  | 0.331 | 0.000 |
| 1958   | EGR1      | early growth response 1                                                                  | 110.428 | 165.908 | 54.948  | 0.331 | 0.000 |
| 9398   | CD101     | CD101 molecule                                                                           | 334.533 | 502.532 | 166.533 | 0.331 | 0.000 |
| 3914   | LAMB3     | laminin, beta 3                                                                          | 172.861 | 259.558 | 86.163  | 0.332 | 0.000 |
| 8676   | STX11     | syntaxin 11                                                                              | 87.097  | 130.766 | 43.427  | 0.332 | 0.000 |
| 1114   | CHGB      | chromogranin B (secretogranin 1)                                                         | 20.867  | 31.312  | 10.422  | 0.333 | 0.004 |
| 84964  | ALKBH6    | alkB, alkylation repair homolog 6 (E. coli)                                              | 222.201 | 333.361 | 111.041 | 0.333 | 0.001 |
| 8870   | IER3      | immediate early response 3                                                               | 46.570  | 69.860  | 23.280  | 0.333 | 0.000 |
| 1E+08  | SIGLEC14  | sialic acid binding Ig-like lectin 14                                                    | 228.714 | 342.761 | 114.667 | 0.335 | 0.000 |
| 729574 | LOC729574 | UPF0627 protein ENSP00000341061/ENSP00000339743                                          | 17.839  | 26.710  | 8.968   | 0.336 | 0.008 |
| 7378   | UPP1      | uridine phosphorylase 1                                                                  | 81.226  | 121.544 | 40.908  | 0.337 | 0.000 |

|        |             |                                                                                                     |         |         |         |       |       |
|--------|-------------|-----------------------------------------------------------------------------------------------------|---------|---------|---------|-------|-------|
| 55423  | SIRPG       | signal-regulatory protein gamma                                                                     | 73.693  | 110.153 | 37.233  | 0.338 | 0.000 |
| 1E+08  | APOBE C3A_B | APOBEC3A and APOBEC3B deletion hybrid                                                               | 54.404  | 81.315  | 27.494  | 0.338 | 0.000 |
| 56944  | OLFML3      | olfactomedin-like 3                                                                                 | 42.557  | 63.599  | 21.515  | 0.338 | 0.000 |
| 4359   | MPZ         | myelin protein zero                                                                                 | 454.350 | 678.970 | 229.729 | 0.338 | 0.000 |
| 197358 | NLRC3       | NLR family, CARD domain containing 3                                                                | 686.698 | 1025.88 | 347.517 | 0.339 | 0.000 |
| 4327   | MMP19       | matrix metalloproteinase 19                                                                         | 107.433 | 160.477 | 54.390  | 0.339 | 0.000 |
| 27113  | BBC3        | BCL2 binding component 3                                                                            | 208.765 | 311.831 | 105.698 | 0.339 | 0.000 |
| 5732   | PTGER 2     | prostaglandin E receptor 2 (subtype EP2), 53kDa                                                     | 45.662  | 68.167  | 23.157  | 0.340 | 0.000 |
| 1053   | CEBPE       | CCAAT/enhancer binding protein (C/EBP), epsilon                                                     | 77.937  | 116.318 | 39.556  | 0.340 | 0.000 |
| 4054   | LTBP3       | latent transforming growth factor beta binding protein 3                                            | 32.656  | 48.664  | 16.648  | 0.342 | 0.002 |
| 11178  | LZTS1       | leucine zipper, putative tumor suppressor 1                                                         | 25.121  | 37.433  | 12.808  | 0.342 | 0.002 |
| 4035   | LRP1        | low density lipoprotein receptor-related protein 1                                                  | 1559.74 | 2323.85 | 795.639 | 0.342 | 0.000 |
| 113675 | SDSL        | serine dehydratase-like                                                                             | 69.061  | 102.875 | 35.246  | 0.343 | 0.000 |
| 84286  | TMEM1 75    | transmembrane protein 175                                                                           | 76.241  | 113.468 | 39.015  | 0.344 | 0.003 |
| 167555 | FAM151 B    | family with sequence similarity 151, member B                                                       | 25.863  | 38.469  | 13.257  | 0.345 | 0.002 |
| 51311  | TLR8        | toll-like receptor 8                                                                                | 231.850 | 344.767 | 118.934 | 0.345 | 0.000 |
| 3732   | CD82        | CD82 molecule                                                                                       | 726.297 | 1079.84 | 372.748 | 0.345 | 0.000 |
| 10347  | ABCA7       | ATP-binding cassette, sub-family A (ABC1), member 7                                                 | 355.385 | 528.375 | 182.395 | 0.345 | 0.003 |
| 1880   | GPR183      | G protein-coupled receptor 183                                                                      | 888.057 | 1320.09 | 456.020 | 0.345 | 0.000 |
| 644165 | BCRP3       | breakpoint cluster region pseudogene 3                                                              | 46.114  | 68.508  | 23.720  | 0.346 | 0.006 |
| 3561   | IL2RG       | interleukin 2 receptor, gamma                                                                       | 122.845 | 182.480 | 63.211  | 0.346 | 0.000 |
| 115817 | DHRS1       | dehydrogenase/reductase (SDR family) member 1                                                       | 148.271 | 220.182 | 76.359  | 0.347 | 0.000 |
| 196883 | ADCY4       | adenylate cyclase 4                                                                                 | 32.424  | 48.120  | 16.727  | 0.348 | 0.001 |
| 1E+08  | ITGB2-AS1   | ITGB2 antisense RNA 1                                                                               | 135.939 | 201.718 | 70.161  | 0.348 | 0.000 |
| 5553   | PRG2        | proteoglycan 2, bone marrow (natural killer cell activator, eosinophil granule major basic protein) | 20.101  | 29.786  | 10.417  | 0.350 | 0.004 |

|        |              |                                                                                              |         |         |         |       |       |
|--------|--------------|----------------------------------------------------------------------------------------------|---------|---------|---------|-------|-------|
| 6349   | CCL3L1       | chemokine (C-C motif) ligand 3-like 1                                                        | 136.325 | 201.715 | 70.935  | 0.352 | 0.000 |
| 83872  | HMCN1        | hemicentin 1                                                                                 | 119.080 | 176.036 | 62.125  | 0.353 | 0.000 |
| 414062 | CCL3L3       | chemokine (C-C motif) ligand 3-like 3                                                        | 135.799 | 200.663 | 70.935  | 0.354 | 0.000 |
| 3706   | ITPKA        | inositol-trisphosphate 3-kinase A                                                            | 28.538  | 42.164  | 14.913  | 0.354 | 0.001 |
| 10871  | CD300C       | CD300c molecule                                                                              | 133.093 | 196.436 | 69.750  | 0.355 | 0.000 |
| 374403 | TBC1D10C     | TBC1 domain family, member 10C                                                               | 53.969  | 79.636  | 28.302  | 0.355 | 0.002 |
| 122402 | TDRD9        | tudor domain containing 9                                                                    | 544.865 | 803.888 | 285.841 | 0.356 | 0.000 |
| 6347   | CCL2         | chemokine (C-C motif) ligand 2                                                               | 377.914 | 557.535 | 198.293 | 0.356 | 0.006 |
| 3198   | HOXA1        | homeobox A1                                                                                  | 55.670  | 82.089  | 29.252  | 0.356 | 0.000 |
| 646799 | ZAR1L        | zygote arrest 1-like                                                                         | 23.503  | 34.634  | 12.372  | 0.357 | 0.004 |
| 285848 | PNPLA1       | patatin-like phospholipase domain containing 1                                               | 60.365  | 88.790  | 31.939  | 0.360 | 0.000 |
| 419    | ART3         | ADP-ribosyltransferase 3 sulfotransferase family, cytosolic, 1A, phenol-preferring, member 1 | 429.243 | 631.188 | 227.298 | 0.360 | 0.000 |
| 6817   | SULT1A1      | triggering receptor expressed on myeloid cells 1                                             | 139.685 | 205.380 | 73.991  | 0.360 | 0.009 |
| 54210  | TREM1        | protease, serine, 36                                                                         | 509.058 | 748.024 | 270.093 | 0.361 | 0.000 |
| 146547 | PRSS36       | carboxylesterase 1                                                                           | 26.727  | 39.248  | 14.206  | 0.362 | 0.002 |
| 51716  | CES1P1       | pseudogene 1                                                                                 | 1298.78 | 1905.59 | 691.968 | 0.363 | 0.000 |
| 1379   | CR1L         | complement component (3b/4b) receptor 1-like                                                 | 53.280  | 78.142  | 28.418  | 0.364 | 0.000 |
| 4811   | NID1         | nidogen 1                                                                                    | 126.745 | 185.875 | 67.615  | 0.364 | 0.000 |
| 5265   | SERPINA1     | serpin peptidase inhibitor, clade A (alpha-1 antitrypsin), member 1                          | 223.518 | 327.594 | 119.442 | 0.365 | 0.000 |
| 64174  | DPEP2        | dipeptidase 2                                                                                | 49.202  | 72.105  | 26.300  | 0.365 | 0.000 |
| 4900   | NRGN         | neurogranin (protein kinase C substrate, RC3)                                                | 323.549 | 474.123 | 172.975 | 0.365 | 0.010 |
| 23150  | FRMD4B       | FERM domain containing 4B                                                                    | 35.216  | 51.579  | 18.852  | 0.366 | 0.001 |
| 3120   | HLA-DQB2     | major histocompatibility complex, class II, DQ beta 2                                        | 65.939  | 96.399  | 35.478  | 0.368 | 0.000 |
| 3123   | HLA-DRB1     | major histocompatibility complex, class II, DR beta 1                                        | 307.246 | 448.639 | 165.852 | 0.370 | 0.000 |
| 1515   | CTSL2        | cathepsin L2                                                                                 | 70.667  | 103.174 | 38.160  | 0.370 | 0.000 |
| 1E+08  | APOBEC3B-AS1 | APOBEC3B antisense RNA 1                                                                     | 47.370  | 69.159  | 25.581  | 0.370 | 0.000 |

|        |          |                                                                   |         |         |         |       |       |
|--------|----------|-------------------------------------------------------------------|---------|---------|---------|-------|-------|
| 3606   | IL18     | interleukin 18 (interferon-gamma-inducing factor)                 | 408.485 | 596.156 | 220.814 | 0.370 | 0.000 |
| 2635   | GBP3     | guanylate binding protein 3                                       | 246.646 | 359.894 | 133.399 | 0.371 | 0.000 |
| 347735 | SERINC2  | serine incorporator 2                                             | 589.999 | 860.880 | 319.118 | 0.371 | 0.000 |
| 399694 | SHC4     | SHC (Src homology 2 domain containing) family, member 4           | 21.476  | 31.324  | 11.628  | 0.371 | 0.009 |
| 80705  | TSGA10   | testis specific, 10                                               | 22.167  | 32.332  | 12.002  | 0.371 | 0.006 |
| 4640   | MYO1A    | myosin IA                                                         | 21.995  | 32.072  | 11.918  | 0.372 | 0.005 |
| 3119   | HLA-DQB1 | major histocompatibility complex, class II, DQ beta 1             | 387.094 | 564.165 | 210.022 | 0.372 | 0.000 |
| 7039   | TGFA     | transforming growth factor, alpha                                 | 44.400  | 64.697  | 24.103  | 0.373 | 0.011 |
| 6714   | SRC      | v-src sarcoma (Schmidt-Ruppin A-2) viral oncogene homolog (avian) | 166.135 | 241.960 | 90.309  | 0.373 | 0.000 |
| 84627  | ZNF469   | zinc finger protein 469                                           | 75.886  | 110.520 | 41.253  | 0.373 | 0.000 |
| 84795  | PYROXD2  | pyridine nucleotide-disulphide oxidoreductase domain 2            | 49.573  | 72.196  | 26.949  | 0.373 | 0.000 |
| 6280   | S100A9   | S100 calcium binding protein A9                                   | 36180.6 | 52690   | 19670.8 | 0.373 | 0.003 |
| 3695   | ITGB7    | integrin, beta 7                                                  | 1057.96 | 1539.09 | 576.838 | 0.375 | 0.000 |
| 1366   | CLDN7    | claudin 7                                                         | 53.214  | 77.411  | 29.016  | 0.375 | 0.001 |
| 116844 | LRG1     | leucine-rich alpha-2-glycoprotein 1                               | 352.226 | 512.282 | 192.169 | 0.375 | 0.000 |
| 724033 | MIR663A  | microRNA 663a                                                     | 537.673 | 781.867 | 293.479 | 0.375 | 0.009 |
| 56666  | PANX2    | pannexin 2                                                        | 22.603  | 32.856  | 12.349  | 0.376 | 0.006 |
| 433    | ASGR2    | asialoglycoprotein receptor 2                                     | 71.792  | 104.352 | 39.233  | 0.376 | 0.000 |
| 246329 | STAC3    | SH3 and cysteine rich domain 3                                    | 713.531 | 1036.73 | 390.328 | 0.376 | 0.000 |
| 54535  | CCHCR1   | coiled-coil alpha-helical rod protein 1                           | 197.395 | 286.721 | 108.069 | 0.377 | 0.002 |
| 23584  | VSIG2    | V-set and immunoglobulin domain containing 2                      | 69.394  | 100.603 | 38.184  | 0.380 | 0.000 |
| 25822  | DNAJB5   | DnaJ (Hsp40) homolog, subfamily B, member 5                       | 21.569  | 31.267  | 11.871  | 0.380 | 0.009 |
| 401944 | LDLRA2   | low density lipoprotein receptor class A domain containing 2      | 90.208  | 130.699 | 49.717  | 0.380 | 0.000 |
| 4688   | NCF2     | neutrophil cytosolic factor 2                                     | 1875.46 | 2717.03 | 1033.89 | 0.381 | 0.000 |
| 3959   | LGALS3BP | lectin, galactoside-binding, soluble, 3 binding protein           | 364.162 | 527.324 | 201.000 | 0.381 | 0.000 |

|        |           |                                                                           |         |         |         |       |       |
|--------|-----------|---------------------------------------------------------------------------|---------|---------|---------|-------|-------|
| 2354   | FOSB      | FBJ murine osteosarcoma viral oncogene homolog B                          | 48.403  | 70.071  | 26.734  | 0.382 | 0.000 |
| 55337  | C19orf66  | chromosome 19 open reading frame 66                                       | 87.459  | 126.536 | 48.382  | 0.382 | 0.000 |
| 728113 | ANXA8L1   | annexin A8-like 1                                                         | 279.297 | 403.650 | 154.943 | 0.384 | 0.000 |
| 9537   | TP53I11   | tumor protein p53 inducible protein 11                                    | 564.552 | 815.253 | 313.851 | 0.385 | 0.000 |
| 57509  | MTUS1     | microtubule associated tumor suppressor 1                                 | 86.803  | 125.318 | 48.287  | 0.385 | 0.005 |
| 5005   | ORM2      | orosomuroid 2                                                             | 31.866  | 45.982  | 17.749  | 0.386 | 0.001 |
| 54874  | FNBP1L    | formin binding protein 1-like                                             | 41.168  | 59.396  | 22.941  | 0.386 | 0.001 |
| 278    | AMY1C     | amylase, alpha 1C (salivary)                                              | 1047.80 | 1511.54 | 584.064 | 0.386 | 0.000 |
| 710    | SERPIN G1 | serpin peptidase inhibitor, clade G (C1 inhibitor), member 1              | 42.807  | 61.736  | 23.878  | 0.387 | 0.001 |
| 277    | AMY1B     | amylase, alpha 1B (salivary)                                              | 1046.81 | 1509.55 | 584.064 | 0.387 | 0.000 |
| 148523 | C1orf51   | chromosome 1 open reading frame 51                                        | 37.842  | 54.529  | 21.154  | 0.388 | 0.001 |
| 276    | AMY1A     | amylase, alpha 1A (salivary)                                              | 1050.13 | 1512.41 | 587.849 | 0.389 | 0.000 |
| 653145 | ANXA8     | annexin A8                                                                | 597.069 | 859.678 | 334.460 | 0.389 | 0.000 |
| 150365 | MEI1      | meiosis inhibitor 1                                                       | 77.641  | 111.734 | 43.548  | 0.390 | 0.000 |
| 2651   | GCNT2     | glucosaminyl (N-acetyl) transferase 2, I-branching enzyme (I blood group) | 25.148  | 36.173  | 14.122  | 0.390 | 0.009 |
| 55359  | STYK1     | serine/threonine/tyrosine kinase 1                                        | 41.527  | 59.708  | 23.346  | 0.391 | 0.008 |
| 51733  | UPB1      | ureidopropionase, beta                                                    | 99.703  | 143.214 | 56.193  | 0.392 | 0.000 |
| 1E+08  | NA        | NA                                                                        | 33.956  | 48.758  | 19.154  | 0.393 | 0.002 |
| 5768   | QSOX1     | quiescin Q6 sulfhydryl oxidase 1                                          | 2178.96 | 3128.35 | 1229.57 | 0.393 | 0.000 |
| 1509   | CTSD      | cathepsin D                                                               | 1230.10 | 1765.81 | 694.391 | 0.393 | 0.005 |
| 285084 | LOC285084 | uncharacterized LOC285084                                                 | 776.211 | 1114.04 | 438.385 | 0.394 | 0.000 |
| 10626  | TRIM16    | tripartite motif containing 16                                            | 604.130 | 865.761 | 342.500 | 0.396 | 0.000 |
| 4485   | MST1      | macrophage stimulating 1 (hepatocyte growth factor-like)                  | 164.089 | 235.133 | 93.045  | 0.396 | 0.000 |
| 80832  | APOL4     | apolipoprotein L, 4                                                       | 1430.78 | 2049.94 | 811.620 | 0.396 | 0.000 |
| 9064   | MAP3K6    | mitogen-activated protein kinase kinase kinase 6                          | 509.224 | 729.581 | 288.867 | 0.396 | 0.000 |
| 2217   | FCGRT     | Fc fragment of IgG, receptor, transporter, alpha                          | 724.809 | 1038.38 | 411.238 | 0.396 | 0.000 |

|        |          |                                                                       |         |         |         |       |       |
|--------|----------|-----------------------------------------------------------------------|---------|---------|---------|-------|-------|
| 11223  | MST1L    | macrophage stimulating 1-like                                         | 57.352  | 82.152  | 32.552  | 0.396 | 0.000 |
| 57153  | SLC44A2  | solute carrier family 44, member 2                                    | 312.132 | 447.049 | 177.215 | 0.396 | 0.000 |
| 80150  | ASRGL1   | asparaginase like 1                                                   | 86.956  | 124.518 | 49.393  | 0.397 | 0.000 |
| 8651   | SOCS1    | suppressor of cytokine signaling 1                                    | 90.656  | 129.799 | 51.512  | 0.397 | 0.000 |
| 25841  | ABTB2    | ankyrin repeat and BTB (POZ) domain containing 2                      | 424.470 | 607.446 | 241.495 | 0.398 | 0.000 |
| 285852 | TREML4   | triggering receptor expressed on myeloid cells-like 4                 | 21.089  | 30.137  | 12.041  | 0.400 | 0.010 |
| 6303   | SAT1     | spermidine/spermine N1-acetyltransferase 1                            | 1945.12 | 2778.63 | 1111.61 | 0.400 | 0.000 |
| 5272   | SERPINB9 | serpin peptidase inhibitor, clade B (ovalbumin), member 9             | 345.143 | 492.774 | 197.512 | 0.401 | 0.000 |
| 9764   | KIAA0513 | KIAA0513                                                              | 174.705 | 249.221 | 100.189 | 0.402 | 0.000 |
| 57413  | NA       | NA                                                                    | 55.584  | 79.254  | 31.914  | 0.403 | 0.000 |
| 57175  | CORO1B   | coronin, actin binding protein, 1B                                    | 310.316 | 442.078 | 178.554 | 0.404 | 0.000 |
| 11209  | MST1P2   | macrophage stimulating 1 (hepatocyte growth factor-like) pseudogene 2 | 76.515  | 108.963 | 44.066  | 0.404 | 0.000 |
| 2906   | GRIN2D   | glutamate receptor, ionotropic, N-methyl D-aspartate 2D               | 99.718  | 142.004 | 57.432  | 0.404 | 0.000 |
| 151534 | LBX2-AS1 | LBX2 antisense RNA 1                                                  | 31.111  | 44.280  | 17.942  | 0.405 | 0.004 |
| 64581  | CLEC7A   | C-type lectin domain family 7, member A                               | 185.998 | 264.695 | 107.302 | 0.405 | 0.005 |
| 25959  | KANK2    | KN motif and ankyrin repeat domains 2                                 | 399.102 | 567.602 | 230.602 | 0.406 | 0.000 |
| 3579   | CXCR2    | chemokine (C-X-C motif) receptor 2                                    | 599.094 | 851.906 | 346.283 | 0.406 | 0.000 |
| 63874  | ABHD4    | abhydrolase domain containing 4                                       | 40.326  | 57.298  | 23.353  | 0.408 | 0.002 |
| 677    | ZFP36L1  | ZFP36 ring finger protein-like 1                                      | 63.437  | 90.119  | 36.755  | 0.408 | 0.000 |
| 6282   | S100A11  | S100 calcium binding protein A11                                      | 504.194 | 716.184 | 292.204 | 0.408 | 0.002 |
| 83959  | SLC4A11  | solute carrier family 4, sodium borate transporter, member 11         | 38.007  | 53.973  | 22.040  | 0.408 | 0.001 |
| 3594   | IL12RB1  | interleukin 12 receptor, beta 1                                       | 718.357 | 1019.73 | 416.979 | 0.409 | 0.000 |
| 5800   | PTPRO    | protein tyrosine phosphatase, receptor type, O                        | 1085.81 | 1540.65 | 630.958 | 0.410 | 0.000 |

|        |           |                                                                                                                      |         |         |         |       |       |
|--------|-----------|----------------------------------------------------------------------------------------------------------------------|---------|---------|---------|-------|-------|
| 79865  | TREML2    | triggering receptor expressed on myeloid cells-like 2                                                                | 498.534 | 707.340 | 289.728 | 0.410 | 0.000 |
| 346389 | MACC1     | metastasis associated in colon cancer 1                                                                              | 58.946  | 83.597  | 34.296  | 0.410 | 0.000 |
| 2811   | GP1BA     | glycoprotein Ib (platelet), alpha polypeptide                                                                        | 23.605  | 33.464  | 13.746  | 0.411 | 0.008 |
| 56548  | CHST7     | carbohydrate (N-acetylglucosamine 6-O) sulfotransferase 7                                                            | 27.341  | 38.757  | 15.925  | 0.411 | 0.008 |
| 10365  | KLF2      | Kruppel-like factor 2 (lung)                                                                                         | 23.879  | 33.848  | 13.909  | 0.411 | 0.008 |
| 3958   | LGALS3    | lectin, galactoside-binding, soluble, 3                                                                              | 61.276  | 86.795  | 35.757  | 0.412 | 0.000 |
| 10970  | CKAP4     | cytoskeleton-associated protein 4                                                                                    | 2754.7  | 3899.56 | 1609.84 | 0.413 | 0.000 |
| 7292   | TNFSF4    | tumor necrosis factor (ligand) superfamily, member 4                                                                 | 36.458  | 51.567  | 21.349  | 0.414 | 0.004 |
| 162394 | SLFN5     | schlafen family member 5                                                                                             | 64.950  | 91.864  | 38.036  | 0.414 | 0.000 |
| 79930  | DOK3      | docking protein 3                                                                                                    | 202.264 | 286.060 | 118.467 | 0.414 | 0.000 |
| 6036   | RNASE2    | ribonuclease, RNase A family, 2 (liver, eosinophil-derived neurotoxin) poly (ADP-ribose) polymerase family, member 9 | 1796.93 | 2540.84 | 1053.02 | 0.414 | 0.000 |
| 83666  | PARP9     | uncharacterized LOC386627                                                                                            | 565.775 | 799.944 | 331.606 | 0.415 | 0.000 |
| 386627 | FLJ38109  | kelch-like family member 25                                                                                          | 37.769  | 53.395  | 22.143  | 0.415 | 0.002 |
| 64410  | KLHL25    | platelet endothelial aggregation receptor 1                                                                          | 39.566  | 55.892  | 23.240  | 0.416 | 0.002 |
| 375033 | PEAR1     | cyclin A1                                                                                                            | 52.533  | 74.145  | 30.922  | 0.417 | 0.001 |
| 8900   | CCNA1     | hepatitis A virus cellular receptor 2                                                                                | 451.506 | 637.218 | 265.794 | 0.417 | 0.000 |
| 84868  | HAVCR2    | tumor necrosis factor receptor superfamily, member 11a, NFKB activator                                               | 366.897 | 517.400 | 216.395 | 0.418 | 0.000 |
| 8792   | TNFRSF11A | pipecolic acid oxidase                                                                                               | 23.922  | 33.731  | 14.113  | 0.418 | 0.012 |
| 51268  | PIPOX     | gamma-glutamyltransferase 5                                                                                          | 108.688 | 153.147 | 64.229  | 0.419 | 0.000 |
| 2687   | GGT5      | CUB domain containing protein 1                                                                                      | 225.227 | 317.019 | 133.435 | 0.421 | 0.001 |
| 64866  | CDCP1     | heat shock 70kDa protein 2                                                                                           | 27.971  | 39.368  | 16.574  | 0.421 | 0.009 |
| 3306   | HSPA2     | interleukin 18 binding protein                                                                                       | 130.057 | 183.041 | 77.074  | 0.421 | 0.000 |
| 10068  | IL18BP    | G protein regulated inducer of neurite                                                                               | 144.405 | 203.132 | 85.677  | 0.422 | 0.009 |
| 114787 | GPRIN1    |                                                                                                                      | 56.238  | 79.098  | 33.378  | 0.422 | 0.000 |



|        |           |                                                                 |         |         |         |       |       |
|--------|-----------|-----------------------------------------------------------------|---------|---------|---------|-------|-------|
|        |           | outgrowth 1                                                     |         |         |         |       |       |
| 374393 | FAM111 B  | family with sequence similarity 111, member B                   | 65.316  | 91.839  | 38.793  | 0.422 | 0.000 |
| 3433   | IFIT2     | interferon-induced protein with tetratricopeptide repeats 2     | 51.637  | 72.596  | 30.678  | 0.423 | 0.008 |
| 57121  | LPAR5     | lysophosphatidic acid receptor 5                                | 34.922  | 49.061  | 20.784  | 0.424 | 0.003 |
| 29965  | CDIP1     | cell death-inducing p53 target 1                                | 107.878 | 151.509 | 64.247  | 0.424 | 0.000 |
| 115677 | NOSTRI N  | nitric oxide synthase trafficker                                | 55.394  | 77.797  | 32.991  | 0.424 | 0.000 |
| 3576   | IL8       | interleukin 8                                                   | 1664.49 | 2335.97 | 993.009 | 0.425 | 0.001 |
| 57520  | HECW2     | HECT, C2 and WW domain containing E3 ubiquitin protein ligase 2 | 46.566  | 65.305  | 27.827  | 0.426 | 0.002 |
| 94120  | SYTL3     | synaptotagmin-like 3                                            | 279.685 | 392.172 | 167.197 | 0.426 | 0.000 |
| 140766 | ADAMT S14 | ADAM metallopeptidase with thrombospondin type 1 motif, 14      | 30.324  | 42.518  | 18.131  | 0.426 | 0.005 |
| 5129   | CDK18     | cyclin-dependent kinase 18                                      | 25.998  | 36.450  | 15.546  | 0.427 | 0.007 |
| 308    | ANXA5     | annexin A5                                                      | 1017.37 | 1426.35 | 608.390 | 0.427 | 0.000 |
| 151056 | PLB1      | phospholipase B1                                                | 167.795 | 235.167 | 100.422 | 0.427 | 0.000 |
| 3856   | KRT8      | keratin 8                                                       | 44.254  | 62.006  | 26.502  | 0.427 | 0.002 |
| 5159   | PDGFR B   | platelet-derived growth factor receptor, beta polypeptide       | 26.605  | 37.265  | 15.945  | 0.428 | 0.007 |
| 5794   | PTPRH     | protein tyrosine phosphatase, receptor type, H                  | 56.470  | 79.077  | 33.863  | 0.428 | 0.001 |
| 94241  | TP53IN P1 | tumor protein p53 inducible nuclear protein 1                   | 1330.69 | 1863.37 | 798.011 | 0.428 | 0.006 |
| 9540   | TP53I3    | tumor protein p53 inducible protein 3                           | 89.893  | 125.865 | 53.920  | 0.428 | 0.000 |
| 55911  | APOBR     | apolipoprotein B receptor                                       | 587.730 | 822.839 | 352.621 | 0.429 | 0.005 |
| 9746   | CLSTN3    | calyntenin 3                                                    | 733.985 | 1027.41 | 440.557 | 0.429 | 0.000 |
| 79659  | DYNC2 H1  | dynein, cytoplasmic 2, heavy chain 1                            | 44.928  | 62.863  | 26.993  | 0.429 | 0.002 |
| 26020  | LRP10     | low density lipoprotein receptor-related protein 10             | 776.362 | 1086.21 | 466.513 | 0.429 | 0.000 |
| 51313  | FAM198 B  | family with sequence similarity 198, member B                   | 160.330 | 224.305 | 96.355  | 0.430 | 0.000 |
| 4343   | MOV10     | Mov10, Moloney leukemia virus 10, homolog (mouse)               | 501.236 | 700.950 | 301.522 | 0.430 | 0.000 |
| 64108  | RTP4      | receptor (chemosensory) transporter protein 4                   | 77.726  | 108.678 | 46.774  | 0.430 | 0.000 |

|        |          |                                                                                      |         |         |         |       |       |
|--------|----------|--------------------------------------------------------------------------------------|---------|---------|---------|-------|-------|
| 79899  | PRR5L    | proline rich 5 like                                                                  | 111.499 | 155.859 | 67.140  | 0.431 | 0.000 |
| 9050   | PSTPIP2  | proline-serine-threonine phosphatase interacting protein 2                           | 271.488 | 379.415 | 163.561 | 0.431 | 0.000 |
| 55711  | FAR2     | fatty acyl CoA reductase 2                                                           | 159.384 | 222.651 | 96.117  | 0.432 | 0.000 |
| 144097 | C11orf84 | chromosome 11 open reading frame 84                                                  | 237.404 | 331.477 | 143.331 | 0.432 | 0.000 |
| 4241   | MF12     | antigen p97 (melanoma associated) identified by monoclonal antibodies 133.2 and 96.5 | 239.883 | 334.895 | 144.870 | 0.433 | 0.007 |
| 3128   | HLA-DRB6 | major histocompatibility complex, class II, DR beta 6 (pseudogene)                   | 62.327  | 86.975  | 37.680  | 0.433 | 0.009 |
| 284124 | FLJ36000 | uncharacterized FLJ36000                                                             | 956.629 | 1333.61 | 579.645 | 0.435 | 0.000 |
| 55723  | ASF1B    | ASF1 anti-silencing function 1 homolog B (S. cerevisiae)                             | 1782.51 | 2484.58 | 1080.44 | 0.435 | 0.000 |
| 290    | ANPEP    | alanyl (membrane) aminopeptidase                                                     | 2999.86 | 4180.54 | 1819.19 | 0.435 | 0.000 |
| 85474  | LBX2     | ladybird homeobox 2                                                                  | 40.024  | 55.744  | 24.305  | 0.436 | 0.003 |
| 1152   | CKB      | creatine kinase, brain                                                               | 33.253  | 46.282  | 20.223  | 0.437 | 0.008 |
| 7832   | BTG2     | BTG family, member 2                                                                 | 1124.95 | 1565.67 | 684.229 | 0.437 | 0.000 |
| 113452 | TMEM54   | transmembrane protein 54                                                             | 55.707  | 77.525  | 33.889  | 0.437 | 0.001 |
| 401331 | RASA4CP  | RAS p21 protein activator 4C, pseudogene                                             | 58.464  | 81.357  | 35.570  | 0.437 | 0.001 |
| 11346  | SYNPO    | synaptopodin                                                                         | 51.905  | 72.192  | 31.619  | 0.438 | 0.004 |
| 1066   | CES1     | carboxylesterase 1                                                                   | 6959.77 | 9677.47 | 4242.07 | 0.438 | 0.000 |
| 3385   | ICAM3    | intercellular adhesion molecule 3                                                    | 697.930 | 970.458 | 425.402 | 0.438 | 0.005 |
| 3300   | DNAJB2   | DnaJ (Hsp40) homolog, subfamily B, member 2                                          | 146.930 | 204.256 | 89.604  | 0.439 | 0.001 |
| 5360   | PLTP     | phospholipid transfer protein                                                        | 85.427  | 118.734 | 52.120  | 0.439 | 0.008 |
| 474344 | GIMAP6   | GTPase, IMAP family member 6                                                         | 392.454 | 545.291 | 239.617 | 0.439 | 0.000 |
| 51816  | CECR1    | cat eye syndrome chromosome region, candidate 1                                      | 220.770 | 306.713 | 134.828 | 0.440 | 0.000 |
| 10924  | SMPDL3A  | sphingomyelin phosphodiesterase, acid-like 3A                                        | 237.380 | 329.684 | 145.077 | 0.440 | 0.000 |
| 83861  | RSPH3    | radial spoke 3 homolog (Chlamydomonas)                                               | 114.922 | 159.589 | 70.255  | 0.440 | 0.000 |
| 56265  | CPXM1    | carboxypeptidase X (M14 family), member 1                                            | 415.979 | 577.087 | 254.871 | 0.442 | 0.000 |
| 64333  | ARHGA    | Rho GTPase activating                                                                | 1195.84 | 1658.61 | 733.069 | 0.442 | 0.000 |

|        |           |                                                                                       |         |         |         |       |       |
|--------|-----------|---------------------------------------------------------------------------------------|---------|---------|---------|-------|-------|
|        | P9        | protein 9                                                                             |         |         |         |       |       |
| 5742   | PTGS1     | prostaglandin-endoperoxide synthase 1 (prostaglandin G/H synthase and cyclooxygenase) | 92.582  | 128.382 | 56.782  | 0.442 | 0.000 |
| 85441  | HELZ2     | helicase with zinc finger 2, transcriptional coactivator                              | 119.062 | 165.069 | 73.055  | 0.443 | 0.000 |
| 165186 | FAM179A   | family with sequence similarity 179, member A                                         | 43.159  | 59.836  | 26.482  | 0.443 | 0.002 |
| 84803  | AGPAT9    | 1-acylglycerol-3-phosphate O-acyltransferase 9                                        | 207.284 | 287.362 | 127.206 | 0.443 | 0.007 |
| 3566   | IL4R      | interleukin 4 receptor                                                                | 646.401 | 895.922 | 396.880 | 0.443 | 0.000 |
| 942    | CD86      | CD86 molecule                                                                         | 569.942 | 789.492 | 350.392 | 0.444 | 0.003 |
| 170371 | C10orf128 | chromosome 10 open reading frame 128                                                  | 184.924 | 256.047 | 113.802 | 0.444 | 0.000 |
| 5600   | MAPK11    | mitogen-activated protein kinase 11                                                   | 38.181  | 52.828  | 23.534  | 0.445 | 0.003 |
| 967    | CD63      | CD63 molecule                                                                         | 850.626 | 1176.53 | 524.720 | 0.446 | 0.005 |
| 116729 | PPP1R27   | protein phosphatase 1, regulatory subunit 27                                          | 43.011  | 59.487  | 26.534  | 0.446 | 0.002 |
| 6609   | SMPD1     | sphingomyelin phosphodiesterase 1, acid lysosomal                                     | 141.327 | 195.409 | 87.244  | 0.446 | 0.004 |
| 3559   | IL2RA     | interleukin 2 receptor, alpha                                                         | 288.400 | 398.746 | 178.055 | 0.447 | 0.000 |
| 220108 | FAM124A   | family with sequence similarity 124A                                                  | 149.797 | 207.091 | 92.503  | 0.447 | 0.000 |
| 3242   | HPD       | 4-hydroxyphenylpyruvate dioxygenase                                                   | 146.284 | 202.193 | 90.374  | 0.447 | 0.001 |
| 2034   | EPAS1     | endothelial PAS domain protein 1                                                      | 177.078 | 244.583 | 109.573 | 0.448 | 0.000 |
| 79630  | C1orf54   | chromosome 1 open reading frame 54                                                    | 491.734 | 679.173 | 304.295 | 0.448 | 0.002 |
| 59342  | SCPEP1    | serine carboxypeptidase 1                                                             | 974.806 | 1344.37 | 605.242 | 0.450 | 0.000 |
| 23670  | TMEM2     | transmembrane protein 2                                                               | 161.219 | 222.295 | 100.143 | 0.450 | 0.000 |
| 2319   | FLOT2     | flotillin 2                                                                           | 1613.38 | 2224.27 | 1002.49 | 0.451 | 0.001 |
| 3816   | KLK1      | kallikrein 1                                                                          | 62.208  | 85.746  | 38.671  | 0.451 | 0.001 |
| 3797   | KIF3C     | kinesin family member 3C                                                              | 397.831 | 548.135 | 247.527 | 0.452 | 0.000 |
| 9114   | ATP6V0D1  | ATPase, H <sup>+</sup> transporting, lysosomal 38kDa, V0 subunit d1                   | 664.279 | 915.064 | 413.494 | 0.452 | 0.002 |
| 140564 | APOBE3C   | apolipoprotein B mRNA editing enzyme, catalytic polypeptide-like 3D                   | 155.347 | 213.963 | 96.731  | 0.452 | 0.000 |

|        |              |                                                                                                              |         |         |         |       |       |
|--------|--------------|--------------------------------------------------------------------------------------------------------------|---------|---------|---------|-------|-------|
| 5337   | PLD1         | phospholipase D1, phosphatidylcholine-specific                                                               | 572.798 | 788.812 | 356.784 | 0.452 | 0.000 |
| 5803   | PTPRZ1       | protein tyrosine phosphatase, receptor-type, Z polypeptide 1                                                 | 346.439 | 476.990 | 215.888 | 0.453 | 0.000 |
| 29785  | CYP2S1       | cytochrome P450, family 2, subfamily S, polypeptide 1                                                        | 144.125 | 198.413 | 89.837  | 0.453 | 0.000 |
| 23547  | LILRA4       | leukocyte immunoglobulin-like receptor, subfamily A (with TM domain), member 4                               | 39.969  | 54.968  | 24.971  | 0.454 | 0.004 |
| 10133  | OPTN         | optineurin                                                                                                   | 159.781 | 219.705 | 99.857  | 0.455 | 0.001 |
| 32     | ACACB        | acetyl-CoA carboxylase beta                                                                                  | 242.557 | 333.513 | 151.602 | 0.455 | 0.000 |
| 150221 | RIMBP3 C     | RIMS binding protein 3C                                                                                      | 158.867 | 218.392 | 99.343  | 0.455 | 0.004 |
| 440804 | RIMBP3 B     | RIMS binding protein 3B                                                                                      | 158.867 | 218.392 | 99.343  | 0.455 | 0.004 |
| 3310   | HSPA6        | heat shock 70kDa protein 6 (HSP70B')                                                                         | 84.093  | 115.581 | 52.605  | 0.455 | 0.000 |
| 161582 | DYX1C1       | dyslexia susceptibility 1 candidate 1                                                                        | 41.798  | 57.377  | 26.219  | 0.457 | 0.008 |
| 94097  | SFXN5        | sideroflexin 5                                                                                               | 44.947  | 61.671  | 28.222  | 0.458 | 0.002 |
| 121512 | FGD4         | FYVE, RhoGEF and PH domain containing 4                                                                      | 708.928 | 972.635 | 445.222 | 0.458 | 0.002 |
| 129607 | CMPK2        | cytidine monophosphate (UMP-CMP) kinase 2, mitochondrial                                                     | 118.788 | 162.963 | 74.612  | 0.458 | 0.000 |
| 1396   | CRIP1        | cysteine-rich protein 1 (intestinal)                                                                         | 163.024 | 223.593 | 102.455 | 0.458 | 0.001 |
| 8309   | ACOX2        | acyl-CoA oxidase 2, branched chain                                                                           | 82.270  | 112.784 | 51.755  | 0.459 | 0.000 |
| 23780  | APOL2        | apolipoprotein L, 2                                                                                          | 486.879 | 667.277 | 306.481 | 0.459 | 0.000 |
| 10610  | ST6GAL NAC2  | ST6 (alpha-N-acetylneuraminyl-2,3-beta-galactosyl-1,3)-N-acetylgalactosaminide alpha-2,6-sialyltransferase 2 | 44.727  | 61.281  | 28.173  | 0.460 | 0.003 |
| 1E+08  | LOC100129083 | uncharacterized LOC100129083                                                                                 | 70.268  | 96.242  | 44.294  | 0.460 | 0.010 |
| 7185   | TRAF1        | TNF receptor-associated factor 1                                                                             | 121.997 | 166.882 | 77.111  | 0.462 | 0.000 |
| 352954 | GATS         | GATS, stromal antigen 3 opposite strand                                                                      | 58.824  | 80.436  | 37.213  | 0.463 | 0.001 |
| 154881 | KCTD7        | potassium channel tetramerisation domain containing 7                                                        | 121.393 | 165.889 | 76.896  | 0.464 | 0.000 |

|        |           |                                                                     |         |         |         |       |       |
|--------|-----------|---------------------------------------------------------------------|---------|---------|---------|-------|-------|
| 339541 | C1orf228  | chromosome 1 open reading frame 228                                 | 133.912 | 182.947 | 84.876  | 0.464 | 0.000 |
| 83853  | ROPN1L    | rhopilin associated tail protein 1-like                             | 77.285  | 105.557 | 49.013  | 0.464 | 0.001 |
| 7060   | THBS4     | thrombospondin 4                                                    | 230.908 | 315.309 | 146.506 | 0.465 | 0.000 |
| 445347 | TARP      | TCR gamma alternate reading frame protein                           | 2059.68 | 2811.81 | 1307.55 | 0.465 | 0.000 |
| 9938   | ARHGA P25 | Rho GTPase activating protein 25                                    | 806.707 | 1101.21 | 512.200 | 0.465 | 0.000 |
| 10745  | PHTF1     | putative homeodomain transcription factor 1                         | 526.295 | 718.382 | 334.209 | 0.465 | 0.000 |
| 10437  | IFI30     | interferon, gamma-inducible protein 30                              | 261.975 | 357.570 | 166.379 | 0.465 | 0.000 |
| 3290   | HSD11B1   | hydroxysteroid (11-beta) dehydrogenase 1                            | 477.055 | 651.029 | 303.082 | 0.466 | 0.000 |
| 1E+08  | LRRC37A8P | leucine rich repeat containing 37, member A8, pseudogene            | 55.919  | 76.304  | 35.534  | 0.466 | 0.002 |
| 9600   | PITPNM1   | phosphatidylinositol transfer protein, membrane-associated 1        | 298.533 | 407.305 | 189.761 | 0.466 | 0.001 |
| 124599 | CD300LB   | CD300 molecule-like family member b                                 | 86.804  | 118.348 | 55.259  | 0.467 | 0.001 |
| 4608   | MYBPH     | myosin binding protein H                                            | 561.088 | 764.951 | 357.225 | 0.467 | 0.005 |
| 85376  | RIMBP3    | RIMS binding protein 3                                              | 82.733  | 112.785 | 52.681  | 0.467 | 0.010 |
| 10044  | SH2D3C    | SH2 domain containing 3C                                            | 292.041 | 398.104 | 185.978 | 0.467 | 0.000 |
| 303    | ANXA2P1   | annexin A2 pseudogene 1                                             | 162.127 | 220.994 | 103.260 | 0.467 | 0.007 |
| 404093 | CUEDC1    | CUE domain containing 1                                             | 159.702 | 217.666 | 101.739 | 0.467 | 0.000 |
| 91544  | UBXN11    | UBX domain protein 11                                               | 856.760 | 1166.86 | 546.661 | 0.468 | 0.001 |
| 400709 | SIGLEC16  | sialic acid binding Ig-like lectin 16 (gene/pseudogene)             | 88.225  | 120.099 | 56.350  | 0.469 | 0.000 |
| 27350  | APOBEC3C  | apolipoprotein B mRNA editing enzyme, catalytic polypeptide-like 3C | 951.302 | 1294.94 | 607.664 | 0.469 | 0.000 |
| 3749   | KCNC4     | potassium voltage-gated channel, Shaw-related subfamily, member 4   | 61.287  | 83.401  | 39.174  | 0.470 | 0.002 |
| 90273  | CEACAM21  | carcinoembryonic antigen-related cell adhesion molecule 21          | 86.768  | 118.055 | 55.481  | 0.470 | 0.001 |
| 6385   | SDC4      | syndecan 4                                                          | 84.882  | 115.489 | 54.276  | 0.470 | 0.000 |
| 79640  | C22orf46  | chromosome 22 open reading frame 46                                 | 351.816 | 478.523 | 225.109 | 0.470 | 0.005 |
| 2204   | FCAR      | Fc fragment of IgA,                                                 | 284.708 | 387.197 | 182.219 | 0.471 | 0.000 |

|        |                 |                                                                                          |         |         |         |       |       |
|--------|-----------------|------------------------------------------------------------------------------------------|---------|---------|---------|-------|-------|
|        |                 | receptor for                                                                             |         |         |         |       |       |
| 51744  | CD244           | CD244 molecule, natural killer cell receptor 2B4                                         | 81.999  | 111.508 | 52.491  | 0.471 | 0.001 |
| 10288  | LILRB2          | leukocyte immunoglobulin-like receptor, subfamily B (with TM and ITIM domains), member 2 | 881.094 | 1198.11 | 564.080 | 0.471 | 0.000 |
| 9826   | ARHGEF11        | Rho guanine nucleotide exchange factor (GEF) 11                                          | 156.737 | 213.065 | 100.408 | 0.471 | 0.000 |
| 5168   | ENPP2           | ectonucleotide pyrophosphatase/phosphodiesterase 2                                       | 410.223 | 557.508 | 262.937 | 0.472 | 0.000 |
| 1870   | E2F2            | E2F transcription factor 2                                                               | 590.725 | 802.596 | 378.855 | 0.472 | 0.000 |
| 1601   | DAB2            | disabled homolog 2, mitogen-responsive phosphoprotein (Drosophila)                       | 185.644 | 252.146 | 119.142 | 0.473 | 0.000 |
| 8741   | TNFSF13         | tumor necrosis factor (ligand) superfamily, member 13                                    | 375.131 | 509.169 | 241.093 | 0.474 | 0.001 |
| 353189 | SLCO4C1         | solute carrier organic anion transporter family, member 4C1                              | 501.857 | 680.900 | 322.814 | 0.474 | 0.003 |
| 3339   | HSPG2           | heparan sulfate proteoglycan 2                                                           | 427.127 | 579.027 | 275.227 | 0.475 | 0.000 |
| 5274   | SERPIN1         | serpin peptidase inhibitor, clade I (neuroserpin), member 1                              | 45.874  | 62.165  | 29.583  | 0.476 | 0.004 |
| 2833   | CXCR3           | chemokine (C-X-C motif) receptor 3                                                       | 156.944 | 212.677 | 101.210 | 0.476 | 0.000 |
| 9466   | IL27RA          | interleukin 27 receptor, alpha                                                           | 112.690 | 152.701 | 72.679  | 0.476 | 0.010 |
| 2212   | FCGR2A          | Fc fragment of IgG, low affinity IIa, receptor (CD32)                                    | 4513.30 | 6115.67 | 2910.93 | 0.476 | 0.005 |
| 5871   | MAP4K2          | mitogen-activated protein kinase kinase kinase 2                                         | 227.494 | 308.245 | 146.743 | 0.476 | 0.000 |
| 407977 | TNFSF12-TNFSF13 | TNFSF12-TNFSF13 readthrough                                                              | 332.327 | 450.247 | 214.407 | 0.476 | 0.000 |
| 3321   | IGSF3           | immunoglobulin superfamily, member 3                                                     | 209.307 | 283.263 | 135.350 | 0.478 | 0.000 |
| 6539   | SLC6A12         | solute carrier family 6 (neurotransmitter transporter, betaine/GABA), member 12          | 49.685  | 67.224  | 32.146  | 0.478 | 0.003 |
| 286    | ANK1            | ankyrin 1, erythrocytic                                                                  | 49.220  | 66.593  | 31.848  | 0.478 | 0.004 |

|        |             |                                                                                                           |         |         |         |       |       |
|--------|-------------|-----------------------------------------------------------------------------------------------------------|---------|---------|---------|-------|-------|
| 6688   | SPI1        | spleen focus forming virus (SFFV) proviral integration oncogene spi1                                      | 912.295 | 1234.04 | 590.554 | 0.479 | 0.011 |
| 80212  | CCDC9<br>2  | coiled-coil domain containing 92                                                                          | 48.234  | 65.234  | 31.234  | 0.479 | 0.006 |
| 6804   | STX1A       | syntaxin 1A (brain)                                                                                       | 110.558 | 149.520 | 71.597  | 0.479 | 0.004 |
| 219285 | SAMD9<br>L  | sterile alpha motif domain containing 9-like                                                              | 730.108 | 987.340 | 472.877 | 0.479 | 0.001 |
| 837    | CASP4       | caspase 4, apoptosis-related cysteine peptidase                                                           | 810.905 | 1096.19 | 525.618 | 0.479 | 0.000 |
| 37     | ACADV<br>L  | acyl-CoA dehydrogenase, very long chain                                                                   | 4804.16 | 6494.26 | 3114.05 | 0.480 | 0.000 |
| 8972   | MGAM        | maltase-glucoamylase (alpha-glucosidase)                                                                  | 389.008 | 525.829 | 252.187 | 0.480 | 0.000 |
| 1378   | CR1         | complement component (3b/4b) receptor 1 (Knops blood group)                                               | 1412.37 | 1908.76 | 915.968 | 0.480 | 0.000 |
| 8497   | PPFIA4      | protein tyrosine phosphatase, receptor type, f polypeptide (PTPRF), interacting protein (liprin), alpha 4 | 283.362 | 382.868 | 183.856 | 0.480 | 0.000 |
| 2679   | GGT3P       | gamma-glutamyltransferase 3 pseudogene                                                                    | 120.809 | 163.218 | 78.400  | 0.480 | 0.006 |
| 9402   | GRAP2       | GRB2-related adaptor protein 2                                                                            | 81.657  | 110.315 | 52.999  | 0.480 | 0.001 |
| 64080  | RBKS        | ribokinase                                                                                                | 94.257  | 127.337 | 61.177  | 0.480 | 0.001 |
| 4778   | NFE2        | nuclear factor (erythroid-derived 2), 45kDa                                                               | 551.000 | 744.256 | 357.743 | 0.481 | 0.000 |
| 5212   | VIT         | vitrin                                                                                                    | 163.381 | 220.664 | 106.098 | 0.481 | 0.000 |
| 27154  | BRPF3       | bromodomain and PHD finger containing, 3                                                                  | 710.144 | 959.104 | 461.184 | 0.481 | 0.000 |
| 304    | ANXA2<br>P2 | annexin A2 pseudogene 2                                                                                   | 1825.24 | 2463.89 | 1186.58 | 0.482 | 0.000 |
| 10493  | VAT1        | vesicle amine transport protein 1 homolog (T. californica)                                                | 1837.52 | 2480.37 | 1194.67 | 0.482 | 0.000 |
| 145957 | NRG4        | neuregulin 4                                                                                              | 204.862 | 276.458 | 133.267 | 0.482 | 0.001 |
| 467    | ATF3        | activating transcription factor 3                                                                         | 202.593 | 273.333 | 131.852 | 0.482 | 0.000 |
| 1606   | DGKA        | diacylglycerol kinase, alpha 80kDa                                                                        | 655.189 | 883.943 | 426.434 | 0.482 | 0.001 |
| 202    | AIM1        | absent in melanoma 1                                                                                      | 1155.03 | 1557.97 | 752.080 | 0.483 | 0.000 |
| 1084   | CEACA<br>M3 | carcinoembryonic antigen-related cell adhesion molecule 3                                                 | 68.667  | 92.612  | 44.722  | 0.483 | 0.001 |
| 55367  | PIDD        | p53-induced death domain protein                                                                          | 408.058 | 549.916 | 266.200 | 0.484 | 0.003 |

|        |                 |                                                                             |         |         |         |       |       |
|--------|-----------------|-----------------------------------------------------------------------------|---------|---------|---------|-------|-------|
| 60489  | APOBE<br>C3G    | apolipoprotein B mRNA<br>editing enzyme, catalytic<br>polypeptide-like 3G   | 154.871 | 208.659 | 101.084 | 0.484 | 0.000 |
| 8061   | FOSL1           | FOS-like antigen 1                                                          | 86.815  | 116.949 | 56.682  | 0.485 | 0.000 |
| 92154  | MTSS1L          | metastasis suppressor 1-<br>like                                            | 62.492  | 84.168  | 40.817  | 0.485 | 0.011 |
| 23053  | ZSWIM8          | zinc finger, SWIM-type<br>containing 8                                      | 671.462 | 903.883 | 439.040 | 0.486 | 0.001 |
| 8418   | CMAHP           | cytidine monophospho-N-<br>acetylneuraminic acid<br>hydroxylase, pseudogene | 322.110 | 433.490 | 210.730 | 0.486 | 0.000 |
| 10039  | PARP3           | poly (ADP-ribose)<br>polymerase family,<br>member 3                         | 149.736 | 201.498 | 97.973  | 0.486 | 0.000 |
| 2210   | FCGR1<br>B      | Fc fragment of IgG, high<br>affinity lb, receptor (CD64)                    | 907.713 | 1221.09 | 594.339 | 0.487 | 0.000 |
| 6352   | CCL5            | chemokine (C-C motif)<br>ligand 5                                           | 631.318 | 849.096 | 413.541 | 0.487 | 0.000 |
| 1643   | DDB2            | damage-specific DNA<br>binding protein 2, 48kDa                             | 1324.61 | 1781.34 | 867.876 | 0.487 | 0.000 |
| 3311   | HSPA7           | heat shock 70kDa protein<br>7 (HSP70B)                                      | 105.018 | 141.102 | 68.934  | 0.489 | 0.000 |
| 133396 | IL31RA          | interleukin 31 receptor A                                                   | 541.706 | 727.556 | 355.856 | 0.489 | 0.000 |
| 10326  | SIRPB1          | signal-regulatory protein<br>beta 1                                         | 1644.26 | 2207.62 | 1080.91 | 0.490 | 0.000 |
| 94032  | CAMK2<br>N2     | calcium/calmodulin-<br>dependent protein kinase<br>II inhibitor 2           | 40.477  | 54.340  | 26.613  | 0.490 | 0.008 |
| 120425 | AMICA1          | adhesion molecule,<br>interacts with CXADR<br>antigen 1                     | 835.676 | 1121.51 | 549.843 | 0.490 | 0.000 |
| 9051   | PSTPIP<br>1     | proline-serine-threonine<br>phosphatase interacting<br>protein 1            | 561.131 | 752.896 | 369.366 | 0.491 | 0.000 |
| 1E+08  | FCGR1<br>C      | Fc fragment of IgG, high<br>affinity lc, receptor<br>(CD64), pseudogene     | 890.373 | 1194.14 | 586.601 | 0.491 | 0.000 |
| 389792 | IER5L           | immediate early response<br>5-like                                          | 182.905 | 245.218 | 120.593 | 0.492 | 0.006 |
| 948    | CD36            | CD36 molecule<br>(thrombospondin receptor)                                  | 3185.23 | 4269.44 | 2101.02 | 0.492 | 0.009 |
| 1E+08  | IQCJ-<br>SCHIP1 | IQCJ-SCHIP1 readthrough                                                     | 418.728 | 561.244 | 276.211 | 0.492 | 0.005 |
| 29970  | SCHIP1          | schwannomin interacting<br>protein 1                                        | 421.969 | 565.538 | 278.401 | 0.492 | 0.005 |
| 6560   | SLC12A<br>4     | solute carrier family 12<br>(potassium/chloride<br>transporters), member 4  | 563.891 | 755.534 | 372.249 | 0.493 | 0.000 |
| 3092   | HIP1            | huntingtin interacting<br>protein 1                                         | 2333.73 | 3126.28 | 1541.18 | 0.493 | 0.000 |



|        |                  |                                                                                     |         |         |         |       |       |
|--------|------------------|-------------------------------------------------------------------------------------|---------|---------|---------|-------|-------|
| 56935  | C11orf7<br>5     | chromosome 11 open<br>reading frame 75                                              | 91.357  | 122.371 | 60.344  | 0.493 | 0.002 |
| 2841   | GPR18            | G protein-coupled<br>receptor 18                                                    | 217.871 | 291.796 | 143.946 | 0.493 | 0.000 |
| 92691  | TMEM1<br>69      | transmembrane protein<br>169                                                        | 64.742  | 86.654  | 42.830  | 0.494 | 0.003 |
| 54507  | ADAMT<br>SL4     | ADAMTS-like 4                                                                       | 440.310 | 589.172 | 291.448 | 0.495 | 0.000 |
| 79733  | E2F8             | E2F transcription factor 8                                                          | 1145.29 | 1532.45 | 758.137 | 0.495 | 0.000 |
| 137835 | TMEM7<br>1       | transmembrane protein 71                                                            | 182.691 | 244.411 | 120.970 | 0.495 | 0.000 |
| 6277   | S100A6           | S100 calcium binding<br>protein A6                                                  | 867.428 | 1160.01 | 574.846 | 0.496 | 0.000 |
| 3437   | IFIT3            | interferon-induced protein<br>with tetratricopeptide<br>repeats 3                   | 113.985 | 152.381 | 75.589  | 0.496 | 0.000 |
| 84875  | PARP10           | poly (ADP-ribose)<br>polymerase family,<br>member 10                                | 472.902 | 631.461 | 314.343 | 0.498 | 0.001 |
| 3687   | ITGAX            | integrin, alpha X<br>(complement component 3<br>receptor 4 subunit)                 | 720.073 | 961.030 | 479.116 | 0.499 | 0.000 |
| 10211  | FLOT1            | flotillin 1                                                                         | 579.336 | 772.915 | 385.757 | 0.499 | 0.000 |
| 89790  | SIGLEC<br>10     | sialic acid binding Ig-like<br>lectin 10                                            | 243.081 | 324.160 | 162.002 | 0.500 | 0.001 |
| 55008  | HERC6            | HECT and RLD domain<br>containing E3 ubiquitin<br>protein ligase family<br>member 6 | 123.078 | 164.104 | 82.052  | 0.500 | 0.003 |
| 1E+08  | NA               | NA                                                                                  | 55.321  | 36.846  | 73.796  | 2.003 | 0.006 |
| 51076  | CUTC             | cutC copper transporter<br>homolog (E. coli)                                        | 1155.28 | 769.277 | 1541.28 | 2.004 | 0.000 |
| 65084  | TMEM1<br>35      | transmembrane protein<br>135                                                        | 1479.94 | 984.217 | 1975.67 | 2.007 | 0.000 |
| 5831   | PYCR1            | pyrroline-5-carboxylate<br>reductase 1                                              | 137.261 | 91.275  | 183.248 | 2.008 | 0.010 |
| 55172  | DNAAF<br>2       | dynein, axonemal,<br>assembly factor 2                                              | 493.953 | 328.393 | 659.512 | 2.008 | 0.000 |
| 153364 | MBLAC<br>2       | metallo-beta-lactamase<br>domain containing 2                                       | 407.201 | 270.670 | 543.731 | 2.009 | 0.000 |
| 2632   | GBE1             | glucan (1,4-alpha-),<br>branching enzyme 1                                          | 3184.84 | 2116.81 | 4252.88 | 2.009 | 0.000 |
| 1E+08  | LOC100<br>190986 | uncharacterized<br>LOC100190986                                                     | 933.875 | 620.609 | 1247.14 | 2.010 | 0.002 |
| 5935   | RBM3             | RNA binding motif (RNP1,<br>RRM) protein 3                                          | 37705.3 | 25049.9 | 50360.7 | 2.010 | 0.000 |
| 57546  | PDP2             | pyruvate dehydrogenase<br>phosphatase catalytic<br>subunit 2                        | 2034.48 | 1351.01 | 2717.96 | 2.012 | 0.000 |
| 5581   | PRKCE            | protein kinase C, epsilon                                                           | 408.427 | 271.084 | 545.770 | 2.013 | 0.000 |

|        |           |                                                                                 |         |         |         |       |       |
|--------|-----------|---------------------------------------------------------------------------------|---------|---------|---------|-------|-------|
| 147727 | ILF3-AS1  | ILF3 antisense RNA 1 (head to head)                                             | 487.504 | 323.497 | 651.511 | 2.014 | 0.000 |
| 8204   | NRIP1     | nuclear receptor interacting protein 1                                          | 3151.11 | 2090.36 | 4211.86 | 2.015 | 0.000 |
| 80155  | NAA15     | N(alpha)-acetyltransferase 15, NatA auxiliary subunit                           | 8048.42 | 5338.16 | 10758.7 | 2.015 | 0.000 |
| 196394 | AMN1      | antagonist of mitotic exit network 1 homolog ( <i>S. cerevisiae</i> )           | 407.336 | 269.844 | 544.827 | 2.019 | 0.000 |
| 6641   | SNTB1     | syntrophin, beta 1 (dystrophin-associated protein A1, 59kDa, basic component 1) | 1484.22 | 983.042 | 1985.39 | 2.020 | 0.000 |
| 23160  | WDR43     | WD repeat domain 43                                                             | 2670.45 | 1765.18 | 3575.72 | 2.026 | 0.000 |
| 692057 | SNORD12   | small nucleolar RNA, C/D box 12                                                 | 153.501 | 101.407 | 205.595 | 2.027 | 0.000 |
| 27068  | PPA2      | pyrophosphatase (inorganic) 2                                                   | 2639.65 | 1742.16 | 3537.13 | 2.030 | 0.000 |
| 9975   | NR1D2     | nuclear receptor subfamily 1, group D, member 2                                 | 641.788 | 423.335 | 860.242 | 2.032 | 0.000 |
| 4285   | MIPEP     | mitochondrial intermediate peptidase                                            | 588.549 | 387.387 | 789.711 | 2.039 | 0.000 |
| 165055 | CCDC138   | coiled-coil domain containing 138                                               | 1099.30 | 723.278 | 1475.33 | 2.040 | 0.000 |
| 414241 | FAM35BP   | family with sequence similarity 35, member A pseudogene                         | 2131.40 | 1400.7  | 2862.09 | 2.043 | 0.000 |
| 340554 | ZC3H12B   | zinc finger CCCH-type containing 12B                                            | 50.061  | 32.872  | 67.250  | 2.046 | 0.008 |
| 51187  | RSL24D1   | ribosomal L24 domain containing 1                                               | 12326.4 | 8086.64 | 16566.9 | 2.049 | 0.000 |
| 4698   | NDUFA5    | NADH dehydrogenase (ubiquinone) 1 alpha subcomplex, 5, 13kDa                    | 1241.25 | 813.159 | 1669.34 | 2.053 | 0.000 |
| 8445   | DYRK2     | dual-specificity tyrosine-(Y)-phosphorylation regulated kinase 2                | 2404.27 | 1573.97 | 3234.57 | 2.055 | 0.000 |
| 5163   | PDK1      | pyruvate dehydrogenase kinase, isozyme 1                                        | 1812.33 | 1186.30 | 2438.36 | 2.055 | 0.000 |
| 283624 | LINC00641 | long intergenic non-protein coding RNA 641                                      | 325.172 | 212.704 | 437.640 | 2.058 | 0.000 |
| 287    | ANK2      | ankyrin 2, neuronal                                                             | 41.125  | 26.889  | 55.361  | 2.059 | 0.009 |
| 23552  | CDK20     | cyclin-dependent kinase 20                                                      | 89.008  | 58.196  | 119.821 | 2.059 | 0.001 |
| 81929  | SEH1L     | SEH1-like ( <i>S. cerevisiae</i> )                                              | 2851.28 | 1850.98 | 3851.57 | 2.081 | 0.000 |
| 29078  | NDUFA4    | NADH dehydrogenase (ubiquinone) complex I, assembly factor 4                    | 268.801 | 174.305 | 363.296 | 2.084 | 0.000 |

|        |               |                                                                  |         |         |         |       |       |
|--------|---------------|------------------------------------------------------------------|---------|---------|---------|-------|-------|
| 1E+08  | FPGT-TNNI3K   | FPGT-TNNI3K readthrough                                          | 121.410 | 78.707  | 164.112 | 2.085 | 0.000 |
| 134728 | IRAK1B P1     | interleukin-1 receptor-associated kinase 1 binding protein 1     | 155.960 | 101.059 | 210.860 | 2.086 | 0.000 |
| 2649   | NR6A1         | nuclear receptor subfamily 6, group A, member 1                  | 101.743 | 65.911  | 137.575 | 2.087 | 0.002 |
| 439965 | FAM35 DP      | family with sequence similarity 35, member A pseudogene          | 2247.25 | 1455.14 | 3039.36 | 2.089 | 0.000 |
| 10560  | SLC19A 2      | solute carrier family 19 (thiamine transporter), member 2        | 568.155 | 367.327 | 768.982 | 2.093 | 0.000 |
| 150709 | ANKAR         | ankyrin and armadillo repeat containing                          | 41.483  | 26.808  | 56.158  | 2.095 | 0.007 |
| 9521   | EEF1E1        | eukaryotic translation elongation factor 1 epsilon 1             | 974.974 | 629.871 | 1320.08 | 2.096 | 0.000 |
| 1E+08  | LOC100 129461 | uncharacterized LOC100129461                                     | 46.459  | 29.989  | 62.930  | 2.098 | 0.003 |
| 23742  | NPAP1         | nuclear pore associated protein 1                                | 68.214  | 43.970  | 92.458  | 2.103 | 0.010 |
| 11222  | MRPL3         | mitochondrial ribosomal protein L3                               | 7714.59 | 4966.17 | 10463.2 | 2.107 | 0.000 |
| 27340  | UTP20         | UTP20, small subunit (SSU) processome component, homolog (yeast) | 1193.53 | 766.882 | 1620.17 | 2.113 | 0.000 |
| 80329  | ULBP1         | UL16 binding protein 1                                           | 33.592  | 21.545  | 45.639  | 2.118 | 0.008 |
| 79731  | NARS2         | asparaginyl-tRNA synthetase 2, mitochondrial (putative)          | 777.700 | 498.687 | 1056.71 | 2.119 | 0.000 |
| 85236  | HIST1H 2BK    | histone cluster 1, H2bk                                          | 100.891 | 64.684  | 137.098 | 2.120 | 0.002 |
| 203197 | C9orf91       | chromosome 9 open reading frame 91                               | 675.901 | 431.199 | 920.603 | 2.135 | 0.000 |
| 150094 | SIK1          | salt-inducible kinase 1                                          | 324.200 | 206.674 | 441.726 | 2.137 | 0.000 |
| 114899 | C1QTN F3      | C1q and tumor necrosis factor related protein 3                  | 239.677 | 152.692 | 326.662 | 2.139 | 0.000 |
| 84842  | HPDL          | 4-hydroxyphenylpyruvate dioxygenase-like                         | 209.240 | 133.299 | 285.182 | 2.139 | 0.000 |
| 114614 | MIR155 HG     | MIR155 host gene (non-protein coding)                            | 532.994 | 339.395 | 726.594 | 2.141 | 0.000 |
| 10799  | RPP40         | ribonuclease P/MRP 40kDa subunit                                 | 445.720 | 283.603 | 607.837 | 2.143 | 0.000 |
| 1E+08  | NA            | NA                                                               | 131.770 | 83.651  | 179.890 | 2.150 | 0.000 |
| 138199 | C9orf41       | chromosome 9 open reading frame 41                               | 1038.7  | 659.342 | 1418.05 | 2.151 | 0.000 |
| 158135 | TTLL11        | tubulin tyrosine ligase-like family, member 11                   | 39.399  | 25.005  | 53.793  | 2.151 | 0.006 |

|        |            |                                                                        |         |         |         |       |       |
|--------|------------|------------------------------------------------------------------------|---------|---------|---------|-------|-------|
| 3157   | HMGCS1     | 3-hydroxy-3-methylglutaryl-CoA synthase 1 (soluble)                    | 11383.7 | 7209.69 | 15557.8 | 2.158 | 0.000 |
| 79896  | THNSL1     | threonine synthase-like 1 (S. cerevisiae)                              | 228.451 | 144.675 | 312.227 | 2.158 | 0.000 |
| 26806  | SNORD44    | small nucleolar RNA, C/D box 44                                        | 136.663 | 86.465  | 186.861 | 2.161 | 0.000 |
| 93587  | TRMT10A    | tRNA methyltransferase 10 homolog A (S. cerevisiae)                    | 723.172 | 457.467 | 988.877 | 2.162 | 0.000 |
| 26996  | GPR160     | G protein-coupled receptor 160                                         | 1626.92 | 1028.81 | 2225.03 | 2.163 | 0.000 |
| 440    | ASNS       | asparagine synthetase (glutamine-hydrolyzing)                          | 374.154 | 236.516 | 511.791 | 2.164 | 0.000 |
| 1E+08  | NA         | NA                                                                     | 33.943  | 21.430  | 46.457  | 2.168 | 0.006 |
| 7518   | XRCC4      | X-ray repair complementing defective repair in Chinese hamster cells 4 | 868.120 | 546.819 | 1189.42 | 2.175 | 0.000 |
| 5174   | PDZK1      | PDZ domain containing 1                                                | 57.432  | 36.174  | 78.690  | 2.175 | 0.002 |
| 91380  | SNORD107   | small nucleolar RNA, C/D box 107                                       | 46.629  | 29.322  | 63.936  | 2.180 | 0.002 |
| 692234 | SNORD103A  | small nucleolar RNA, C/D box 103A                                      | 60.182  | 37.809  | 82.554  | 2.183 | 0.001 |
| 692235 | SNORD103B  | small nucleolar RNA, C/D box 103B                                      | 60.182  | 37.809  | 82.554  | 2.183 | 0.001 |
| 79469  | DLEU2L     | deleted in lymphocytic leukemia 2-like                                 | 455.253 | 285.307 | 625.199 | 2.191 | 0.000 |
| 10274  | STAG1      | stromal antigen 1                                                      | 946.130 | 589.598 | 1302.66 | 2.209 | 0.000 |
| 10622  | POLR3G     | polymerase (RNA) III (DNA directed) polypeptide G (32kD)               | 562.759 | 350.134 | 775.383 | 2.215 | 0.000 |
| 51175  | TUBE1      | tubulin, epsilon 1                                                     | 450.466 | 279.329 | 621.602 | 2.225 | 0.000 |
| 79712  | GTDC1      | glycosyltransferase-like domain containing 1                           | 284.158 | 176.050 | 392.266 | 2.228 | 0.000 |
| 728963 | RPS15A P10 | ribosomal protein S15a pseudogene 10                                   | 35.523  | 21.992  | 49.055  | 2.231 | 0.007 |
| 108    | ADCY2      | adenylate cyclase 2 (brain)                                            | 727.868 | 449.927 | 1005.81 | 2.235 | 0.000 |
| 112849 | L3HYPD H   | L-3-hydroxyproline dehydratase (trans-)                                | 167.339 | 103.380 | 231.298 | 2.237 | 0.000 |
| 26770  | SNORD79    | small nucleolar RNA, C/D box 79                                        | 111.162 | 68.655  | 153.668 | 2.238 | 0.000 |
| 94015  | TTYH2      | tweety homolog 2 (Drosophila)                                          | 35.000  | 21.531  | 48.470  | 2.251 | 0.004 |
| 27165  | GLS2       | glutaminase 2 (liver, mitochondrial)                                   | 33.852  | 20.775  | 46.929  | 2.259 | 0.009 |
| 3899   | AFF3       | AF4/FMR2 family, member 3                                              | 3439.39 | 2108.32 | 4770.46 | 2.263 | 0.000 |

|        |            |                                                        |         |         |         |       |       |
|--------|------------|--------------------------------------------------------|---------|---------|---------|-------|-------|
| 653643 | GOLGA 6D   | golgin A6 family, member D                             | 32.747  | 20.072  | 45.422  | 2.263 | 0.005 |
| 388341 | FAM211 A   | family with sequence similarity 211, member A          | 42.352  | 25.904  | 58.799  | 2.270 | 0.003 |
| 56902  | PNO1       | partner of NOB1 homolog (S. cerevisiae)                | 1004.61 | 614.281 | 1394.94 | 2.271 | 0.000 |
| 230    | ALDOC      | aldolase C, fructose-bisphosphate                      | 3099.87 | 1889.14 | 4310.60 | 2.282 | 0.000 |
| 64318  | NOC3L      | nucleolar complex associated 3 homolog (S. cerevisiae) | 2228.05 | 1357.08 | 3099.02 | 2.284 | 0.000 |
| 54517  | PUS7       | pseudouridylate synthase 7 homolog (S. cerevisiae)     | 1029.92 | 623.433 | 1436.4  | 2.304 | 0.000 |
| 84546  | SNORD 35B  | small nucleolar RNA, C/D box 35B                       | 27.668  | 16.707  | 38.629  | 2.312 | 0.008 |
| 10301  | DLEU1      | deleted in lymphocytic leukemia 1 (non-protein coding) | 159.284 | 96.157  | 222.411 | 2.313 | 0.000 |
| 595100 | SNORD 18C  | small nucleolar RNA, C/D box 18C                       | 52.582  | 31.724  | 73.439  | 2.315 | 0.001 |
| 7152   | TOP1P2     | topoisomerase (DNA) I pseudogene 2                     | 122.143 | 73.519  | 170.767 | 2.323 | 0.000 |
| 9188   | DDX21      | DEAD (Asp-Glu-Ala-Asp) box helicase 21                 | 15466.7 | 9287.88 | 21645.5 | 2.331 | 0.000 |
| 5080   | PAX6       | paired box 6                                           | 52.566  | 31.549  | 73.584  | 2.332 | 0.001 |
| 6936   | GCFC2      | GC-rich sequence DNA-binding factor 2                  | 606.822 | 363.472 | 850.173 | 2.339 | 0.000 |
| 26802  | SNORD 47   | small nucleolar RNA, C/D box 47                        | 537.969 | 322.001 | 753.937 | 2.341 | 0.000 |
| 51397  | COMMD 10   | COMM domain containing 10                              | 291.991 | 174.647 | 409.335 | 2.344 | 0.000 |
| 400121 | LINC00 547 | long intergenic non-protein coding RNA 547             | 31.007  | 18.541  | 43.473  | 2.345 | 0.006 |
| 161436 | EML5       | echinoderm microtubule associated protein like 5       | 62.302  | 37.188  | 87.416  | 2.351 | 0.000 |
| 55889  | GOLGA 6B   | golgin A6 family, member B                             | 31.623  | 18.831  | 44.414  | 2.359 | 0.003 |
| 63027  | SLC22A 23  | solute carrier family 22, member 23                    | 51.223  | 30.440  | 72.006  | 2.366 | 0.001 |
| 4040   | LRP6       | low density lipoprotein receptor-related protein 6     | 81.694  | 48.352  | 115.036 | 2.379 | 0.000 |
| 131076 | CCDC5 8    | coiled-coil domain containing 58                       | 2538.82 | 1496.47 | 3581.18 | 2.393 | 0.000 |
| 26049  | FAM169 A   | family with sequence similarity 169, member A          | 34.087  | 19.990  | 48.185  | 2.410 | 0.003 |
| 64172  | OSGEP L1   | O-sialoglycoprotein endopeptidase-like 1               | 364.511 | 213.403 | 515.619 | 2.416 | 0.000 |

|        |              |                                                            |         |         |         |       |       |
|--------|--------------|------------------------------------------------------------|---------|---------|---------|-------|-------|
| 1787   | TRDMT1       | tRNA aspartic acid methyltransferase 1                     | 502.347 | 293.640 | 711.054 | 2.422 | 0.000 |
| 3112   | HLA-DOB      | major histocompatibility complex, class II, DO beta        | 28.411  | 16.607  | 40.215  | 2.422 | 0.006 |
| 283596 | SNHG10       | small nucleolar RNA host gene 10 (non-protein coding)      | 238.796 | 139.248 | 338.345 | 2.430 | 0.000 |
| 10785  | WDR4         | WD repeat domain 4                                         | 669.955 | 389.598 | 950.312 | 2.439 | 0.000 |
| 23251  | KIAA1024     | KIAA1024                                                   | 79.253  | 46.069  | 112.437 | 2.441 | 0.000 |
| 677842 | SNORA76      | small nucleolar RNA, H/ACA box 76                          | 41.052  | 23.759  | 58.344  | 2.456 | 0.001 |
| 200916 | RPL22L1      | ribosomal protein L22-like 1                               | 372.474 | 215.517 | 529.430 | 2.457 | 0.000 |
| 388610 | TRNP1        | TMF1-regulated nuclear protein 1                           | 55.254  | 31.806  | 78.702  | 2.474 | 0.000 |
| 441168 | FAM26F       | family with sequence similarity 26, member F               | 24.450  | 14.057  | 34.843  | 2.479 | 0.009 |
| 692201 | SNORD86      | small nucleolar RNA, C/D box 86                            | 270.748 | 155.321 | 386.175 | 2.486 | 0.000 |
| 205    | AK4          | adenylate kinase 4                                         | 564.496 | 323.355 | 805.638 | 2.491 | 0.000 |
| 1E+08  | LOC100130417 | uncharacterized LOC100130417                               | 45.959  | 26.190  | 65.729  | 2.510 | 0.003 |
| 2      | A2M          | alpha-2-macroglobulin                                      | 25.125  | 14.292  | 35.957  | 2.516 | 0.005 |
| 4609   | MYC          | v-myc myelocytomatosis viral oncogene homolog (avian)      | 5699.15 | 3231.63 | 8166.66 | 2.527 | 0.000 |
| 5071   | PARK2        | parkinson protein 2, E3 ubiquitin protein ligase (parkin)  | 139.868 | 79.285  | 200.451 | 2.528 | 0.000 |
| 9547   | CXCL14       | chemokine (C-X-C motif) ligand 14                          | 34.504  | 19.480  | 49.528  | 2.543 | 0.001 |
| 144577 | C12orf66     | chromosome 12 open reading frame 66                        | 229.226 | 129.410 | 329.043 | 2.543 | 0.000 |
| 692063 | SNORA32      | small nucleolar RNA, H/ACA box 32                          | 50.302  | 28.208  | 72.397  | 2.567 | 0.000 |
| 692225 | SNORD94      | small nucleolar RNA, C/D box 94                            | 150.135 | 83.964  | 216.307 | 2.576 | 0.000 |
| 9298   | SNORD31      | small nucleolar RNA, C/D box 31                            | 42.449  | 23.708  | 61.190  | 2.581 | 0.001 |
| 8614   | STC2         | stanniocalcin 2                                            | 446.763 | 249.385 | 644.142 | 2.583 | 0.000 |
| 1E+08  | NA           | NA                                                         | 67.857  | 37.838  | 97.876  | 2.587 | 0.000 |
| 1E+08  | LOC100288974 | BMS1 homolog, ribosome assembly protein (yeast) pseudogene | 31.398  | 17.353  | 45.444  | 2.619 | 0.002 |
| 9303   | SNORD25      | small nucleolar RNA, C/D box 25                            | 27.327  | 15.045  | 39.608  | 2.633 | 0.002 |
| 347686 | SNORD64      | small nucleolar RNA, C/D box 64                            | 30.961  | 17.020  | 44.901  | 2.638 | 0.002 |

|        |            |                                                                                                                                             |         |         |         |       |       |
|--------|------------|---------------------------------------------------------------------------------------------------------------------------------------------|---------|---------|---------|-------|-------|
| 641455 | POTEM      | POTE ankyrin domain family, member M                                                                                                        | 83.877  | 45.606  | 122.149 | 2.678 | 0.000 |
| 23109  | DDN        | dendrin                                                                                                                                     | 48.985  | 26.514  | 71.456  | 2.695 | 0.000 |
| 653641 | GOLGA6C    | golgin A6 family, member C                                                                                                                  | 29.436  | 15.927  | 42.945  | 2.696 | 0.002 |
| 6875   | TAF4B      | TAF4b RNA polymerase II, TATA box binding protein (TBP)-associated factor, 105kDa                                                           | 728.306 | 393.380 | 1063.23 | 2.703 | 0.000 |
| 26805  | SNORD45A   | small nucleolar RNA, C/D box 45A                                                                                                            | 82.223  | 44.327  | 120.119 | 2.710 | 0.000 |
| 677805 | SNORA18    | small nucleolar RNA, H/ACA box 18                                                                                                           | 49.394  | 26.599  | 72.189  | 2.714 | 0.000 |
| 93986  | FOXP2      | forkhead box P2                                                                                                                             | 938.972 | 499.863 | 1378.08 | 2.757 | 0.000 |
| 692072 | SNORD5     | small nucleolar RNA, C/D box 5                                                                                                              | 305.215 | 162.192 | 448.238 | 2.764 | 0.000 |
| 586    | BCAT1      | branched chain amino-acid transaminase 1, cytosolic                                                                                         | 2687.73 | 1424.68 | 3950.78 | 2.773 | 0.000 |
| 407975 | MIR17HG    | miR-17-92 cluster host gene (non-protein coding)                                                                                            | 610.929 | 315.614 | 906.245 | 2.871 | 0.000 |
| 1E+08  | JARID2-AS1 | JARID2 antisense RNA 1                                                                                                                      | 23.099  | 11.888  | 34.309  | 2.886 | 0.005 |
| 1244   | ABCC2      | ATP-binding cassette, sub-family C (CFTR/MRP), member 2                                                                                     | 34.055  | 17.432  | 50.678  | 2.907 | 0.000 |
| 645332 | FAM86C2P   | family with sequence similarity 86, member A pseudogene                                                                                     | 68.313  | 34.937  | 101.688 | 2.911 | 0.000 |
| 1E+08  | LINC00507  | long intergenic non-protein coding RNA 507                                                                                                  | 52.157  | 26.635  | 77.678  | 2.916 | 0.002 |
| 1E+08  | NA         | NA                                                                                                                                          | 56.904  | 29.045  | 84.764  | 2.918 | 0.000 |
| 2200   | FBN1       | fibrillin 1                                                                                                                                 | 60.827  | 30.637  | 91.018  | 2.971 | 0.000 |
| 9300   | SNORD28    | small nucleolar RNA, C/D box 28                                                                                                             | 30.896  | 15.430  | 46.362  | 3.005 | 0.001 |
| 342096 | GOLGA6A    | golgin A6 family, member A                                                                                                                  | 23.244  | 11.583  | 34.906  | 3.014 | 0.002 |
| 26769  | SNORD81    | small nucleolar RNA, C/D box 81                                                                                                             | 325.117 | 161.332 | 488.901 | 3.030 | 0.000 |
| 1E+08  | NA         | NA                                                                                                                                          | 227.225 | 112.619 | 341.830 | 3.035 | 0.000 |
| 677794 | SNORA2B    | small nucleolar RNA, H/ACA box 2B                                                                                                           | 17.537  | 8.684   | 26.391  | 3.039 | 0.004 |
| 407048 | MIR92A1    | microRNA 92a-1                                                                                                                              | 26.716  | 13.144  | 40.287  | 3.065 | 0.001 |
| 54437  | SEMA5B     | sema domain, seven thrombospondin repeats (type 1 and type 1-like), transmembrane domain (TM) and short cytoplasmic domain, (semaphorin) 5B | 24.265  | 11.925  | 36.605  | 3.070 | 0.001 |

|        |                 |                                                                                |         |         |         |       |       |
|--------|-----------------|--------------------------------------------------------------------------------|---------|---------|---------|-------|-------|
| 26813  | SNORD<br>36C    | small nucleolar RNA, C/D<br>box 36C                                            | 53.141  | 26.097  | 80.185  | 3.073 | 0.000 |
| 1E+08  | MIR129<br>1     | microRNA 1291                                                                  | 21.376  | 10.360  | 32.392  | 3.127 | 0.006 |
| 132203 | SNTN            | sentan, cilia apical<br>structure protein                                      | 12.887  | 6.126   | 19.649  | 3.207 | 0.010 |
| 1E+08  | SNORD<br>12B    | small nucleolar RNA, C/D<br>box 12B                                            | 33.116  | 15.528  | 50.704  | 3.265 | 0.000 |
| 3005   | H1F0            | H1 histone family, member<br>0                                                 | 355.614 | 159.970 | 551.259 | 3.446 | 0.000 |
| 54898  | ELOVL2          | ELOVL fatty acid elongase<br>2                                                 | 26.779  | 11.820  | 41.738  | 3.531 | 0.000 |
| 1E+08  | DENND<br>5B-AS1 | DENND5B antisense RNA<br>1                                                     | 11.533  | 4.868   | 18.198  | 3.738 | 0.007 |
| 7881   | KCNAB<br>1      | potassium voltage-gated<br>channel, shaker-related<br>subfamily, beta member 1 | 14.676  | 6.104   | 23.249  | 3.809 | 0.002 |
| 753    | LDLRA<br>D4     | low density lipoprotein<br>receptor class A domain<br>containing 4             | 183.545 | 75.059  | 292.031 | 3.891 | 0.000 |
| 406980 | MIR19B<br>1     | microRNA 19b-1                                                                 | 10.362  | 4.211   | 16.514  | 3.922 | 0.011 |
| 6414   | SEPP1           | selenoprotein P, plasma, 1                                                     | 12.992  | 5.206   | 20.779  | 3.991 | 0.003 |
| 8350   | HIST1H<br>3A    | histone cluster 1, H3a                                                         | 13.200  | 5.162   | 21.237  | 4.114 | 0.003 |
| 8336   | HIST1H<br>2AM   | histone cluster 1, H2am                                                        | 54.971  | 20.923  | 89.020  | 4.255 | 0.010 |
| 723790 | HIST2H<br>2AA4  | histone cluster 2, H2aa4                                                       | 376.195 | 138.145 | 614.245 | 4.446 | 0.006 |
| 8337   | HIST2H<br>2AA3  | histone cluster 2, H2aa3                                                       | 376.195 | 138.145 | 614.245 | 4.446 | 0.006 |
| 1E+08  | KCNQ5-<br>IT1   | KCNQ5 intronic transcript<br>1 (non-protein coding)                            | 7.820   | 2.868   | 12.772  | 4.452 | 0.012 |
| 26768  | RNU105<br>A     | RNA, U105A small<br>nucleolar                                                  | 24.242  | 8.779   | 39.704  | 4.523 | 0.005 |
| 3006   | HIST1H<br>1C    | histone cluster 1, H1c                                                         | 20.923  | 7.518   | 34.329  | 4.566 | 0.000 |
| 259293 | TAS2R3<br>0     | taste receptor, type 2,<br>member 30                                           | 9.474   | 3.390   | 15.558  | 4.589 | 0.007 |
| 1E+08  | NA              | NA                                                                             | 9.512   | 3.390   | 15.635  | 4.612 | 0.006 |
| 8344   | HIST1H<br>2BE   | histone cluster 1, H2be                                                        | 23.266  | 8.126   | 38.406  | 4.726 | 0.001 |
| 375316 | RBM44           | RNA binding motif protein<br>44                                                | 20.304  | 6.730   | 33.878  | 5.034 | 0.000 |
| 3698   | ITIH2           | inter-alpha-trypsin inhibitor<br>heavy chain 2                                 | 22.824  | 7.413   | 38.235  | 5.158 | 0.000 |
| 554313 | HIST2H<br>4B    | histone cluster 2, H4b                                                         | 26.201  | 8.410   | 43.993  | 5.231 | 0.000 |
| 8370   | HIST2H<br>4A    | histone cluster 2, H4a                                                         | 26.201  | 8.410   | 43.993  | 5.231 | 0.000 |
| 692106 | SNORD<br>65     | small nucleolar RNA, C/D<br>box 65                                             | 37.556  | 11.750  | 63.363  | 5.392 | 0.000 |



|        |               |                                                                                  |        |        |         |         |       |
|--------|---------------|----------------------------------------------------------------------------------|--------|--------|---------|---------|-------|
| 8347   | HIST1H<br>2BC | histone cluster 1, H2bc                                                          | 11.113 | 3.472  | 18.753  | 5.401   | 0.008 |
| 8354   | HIST1H<br>3I  | histone cluster 1, H3i                                                           | 15.593 | 4.444  | 26.742  | 6.018   | 0.008 |
| 8357   | HIST1H<br>3H  | histone cluster 1, H3h                                                           | 7.232  | 1.961  | 12.503  | 6.376   | 0.007 |
| 57722  | IGDCC4        | immunoglobulin<br>superfamily, DCC<br>subclass, member 4                         | 6.394  | 1.623  | 11.164  | 6.878   | 0.007 |
| 3012   | HIST1H<br>2AE | histone cluster 1, H2ae                                                          | 30.796 | 7.793  | 53.798  | 6.903   | 0.001 |
| 8367   | HIST1H<br>4E  | histone cluster 1, H4e                                                           | 17.683 | 4.304  | 31.061  | 7.216   | 0.002 |
| 25805  | BAMBI         | BMP and activin<br>membrane-bound inhibitor<br>homolog ( <i>Xenopus laevis</i> ) | 11.486 | 2.764  | 20.208  | 7.312   | 0.000 |
| 3008   | HIST1H<br>1E  | histone cluster 1, H1e                                                           | 12.376 | 2.969  | 21.782  | 7.336   | 0.004 |
| 317772 | HIST2H<br>2AB | histone cluster 2, H2ab                                                          | 78.313 | 18.237 | 138.389 | 7.588   | 0.001 |
| 336    | APOA2         | apolipoprotein A-II                                                              | 7.521  | 1.711  | 13.331  | 7.790   | 0.002 |
| 8332   | HIST1H<br>2AL | histone cluster 1, H2al                                                          | 12.009 | 2.587  | 21.430  | 8.282   | 0.001 |
| 8341   | HIST1H<br>2BN | histone cluster 1, H2bn                                                          | 8.933  | 1.761  | 16.106  | 9.146   | 0.003 |
| 8970   | HIST1H<br>2BJ | histone cluster 1, H2bj                                                          | 12.418 | 2.431  | 22.405  | 9.215   | 0.000 |
| 8348   | HIST1H<br>2BO | histone cluster 1, H2bo                                                          | 6.914  | 0.953  | 12.876  | 13.511  | 0.001 |
| 645752 | LOC645<br>752 | golgin A6 family, member<br>A pseudogene                                         | 5.340  | 0.714  | 9.965   | 13.950  | 0.002 |
| 335    | APOA1         | apolipoprotein A-I                                                               | 7.199  | 0.953  | 13.444  | 14.108  | 0.001 |
| 8365   | HIST1H<br>4H  | histone cluster 1, H4h                                                           | 17.771 | 2.299  | 33.242  | 14.459  | 0.001 |
| 8339   | HIST1H<br>2BG | histone cluster 1, H2bg                                                          | 19.291 | 2.438  | 36.143  | 14.822  | 0.001 |
| 1E+08  | NA            | NA                                                                               | 3.561  | 0.288  | 6.833   | 23.704  | 0.010 |
| 4907   | NT5E          | 5'-nucleotidase, ecto<br>(CD73)                                                  | 4.414  | 0.332  | 8.496   | 25.564  | 0.003 |
| 1E+08  | MIR153<br>7   | microRNA 1537                                                                    | 6.404  | 0.288  | 12.520  | 43.431  | 0.000 |
| 10202  | DHRS2         | dehydrogenase/reductase<br>(SDR family) member 2                                 | 17.681 | 0.670  | 34.692  | 51.758  | 0.000 |
| 213    | ALB           | albumin                                                                          | 38.735 | 1.241  | 76.229  | 61.413  | 0.000 |
| 7018   | TF            | transferrin                                                                      | 13.178 | 0.288  | 26.067  | 90.421  | 0.000 |
| 23519  | ANP32D        | acidic (leucine-rich)<br>nuclear phosphoprotein 32<br>family, member D           | 87.270 | 0.714  | 173.825 | 243.340 | 0.000 |
| 5950   | RBP4          | retinol binding protein 4,<br>plasma                                             | 44.602 | 0.000  | 89.205  | Inf     | 0.000 |

|        |          |                                              |        |       |        |     |       |
|--------|----------|----------------------------------------------|--------|-------|--------|-----|-------|
| 338    | APOB     | apolipoprotein B (including Ag(x) antigen)   | 38.002 | 0.000 | 76.004 | Inf | 0.000 |
| 174    | AFP      | alpha-fetoprotein                            | 27.706 | 0.000 | 55.413 | Inf | 0.000 |
| 2719   | GPC3     | glypican 3                                   | 23.715 | 0.000 | 47.430 | Inf | 0.000 |
| 2266   | FGG      | fibrinogen gamma chain                       | 15.417 | 0.000 | 30.835 | Inf | 0.000 |
| 197    | AHSG     | alpha-2-HS-glycoprotein                      | 13.671 | 0.000 | 27.342 | Inf | 0.000 |
| 2243   | FGA      | fibrinogen alpha chain                       | 12.360 | 0.000 | 24.721 | Inf | 0.000 |
| 3484   | IGFBP1   | insulin-like growth factor binding protein 1 | 7.259  | 0.000 | 14.519 | Inf | 0.000 |
| 401898 | ZNF833 P | zinc finger protein 833, pseudogene          | 3.789  | 0.000 | 7.577  | Inf | 0.002 |
| 259    | AMBP     | alpha-1-microglobulin/bikunin precursor      | 3.211  | 0.000 | 6.422  | Inf | 0.004 |
| 440077 | ZNF705 A | zinc finger protein 705A                     | 2.769  | 0.000 | 5.538  | Inf | 0.009 |
| 3481   | IGF2     | insulin-like growth factor 2 (somatomedin A) | 2.620  | 0.000 | 5.240  | Inf | 0.012 |
| 723961 | INS-IGF2 | INS-IGF2 readthrough                         | 2.620  | 0.000 | 5.240  | Inf | 0.012 |

Table S1. Gene expression profile upon treatment with RAC1.
